# Supplementary material for: Machine learning for smell: ordinal odor strength prediction of molecular perfumery components
Source: Royal Society of Chemistry journal article supplement (doi:10.1039/d6ra01805j), 2026-05-14
Supplement: d6ra01805j1.pdf [file d6ra01805j1.pdf]

# Supporting Information for "Machine learning for smell: Ordinal odor strength prediction of molecular perfumery components"

Peter Fichtelmann<sup>a</sup> and Julia Westermayr<sup>a,b</sup>

<sup>a</sup> Wilhelm-Ostwald Institute of Physical and Theoretical Chemistry, Leipzig University, Linnéstraße 2, 04103 Leipzig, Germany

<sup>b</sup> Center for Scalable Data Analytics and Artificial Intelligence Dresden/Leipzig, Humboldtstraße 25, 04105 Leipzig, Germany

## Contents

|                                                                 |           |
|-----------------------------------------------------------------|-----------|
| <b>S1 Curated data set and odorous chemical space details</b>   | <b>2</b>  |
| S1.1 Dataset label distribution . . . . .                       | 2         |
| S1.2 2D representations of the odorous chemical space . . . . . | 3         |
| S1.3 Clustering . . . . .                                       | 8         |
| S1.4 PCA loadings . . . . .                                     | 9         |
| <b>S2 Hyperparameter ranges</b>                                 | <b>10</b> |
| S2.1 Encoders . . . . .                                         | 10        |
| S2.2 Predictors . . . . .                                       | 10        |
| <b>S3 Direct and indirect approach model performance</b>        | <b>15</b> |
| <b>S4 Direct ensemble model validation</b>                      | <b>20</b> |
| <b>S5 SHAP feature importance analysis</b>                      | <b>21</b> |
| <b>S6 Further Method Details</b>                                | <b>28</b> |

## S1 Curated data set and odorous chemical space details

Here, we additional data about the label distribution of our curated dataset, 2D representations, clustering results and PCA loadings on RDKit Descriptors.

### S1.1 Dataset label distribution

The number of molecules in the curated data set regarding their odor strength categories and data set source is specified in Table S1. Regarding noise due to impurities in the compounds, we report value counts of the label-label pairs of the 70 intersecting molecules between our dataset and the GC-analyzed compounds from Mayhew *et al.*<sup>1</sup> in Figure S1.

**Table S1** Number of molecules in the data set by odor strength. 12 Good Scents molecules with very high odor strength were counted towards high odor strength.

| Odor strength | Count Good Scents | Count PubChem | Total count |
|---------------|-------------------|---------------|-------------|
| odorless      | 144               | 519           | 663         |
| low           | 156               | 127           | 283         |
| medium        | 1065              | 0             | 1065        |
| high          | 313               | 69            | 382         |
| Sum           | 1678              | 715           | 2393        |

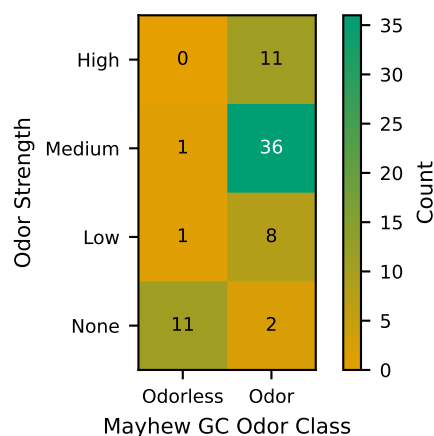

**Figure S1** Value counts of the label-label pairs of the 70 intersecting molecules between our dataset and the GC-analyzed compounds in Mayhew *et al.*<sup>1</sup>. Only 2 of 57 as odorous labelled molecules by Good Scents/PubChem were odorless after Mayhew *et al.*. That are only 3.5% misclassifications and far from the reported 22% odorless rate.

## S1.2 2D representations of the odorous chemical space

2D representations of the odorous chemical space, including molecules of our data set, are shown in Figure S2-Figure S6. We observed similar results with (Figure S2, Figure S4, Figure S5) and without (Figure S3, Figure S6) a background of potential odorous molecules (downsample from the GDB-17 database<sup>2</sup> with a predicted odor probability of 50% or more according to the best-performing model from Mayhew *et al.*<sup>1</sup>). Principal component analysis (PCA) and uniform manifold approximation and projection (UMAP) were used to reduce the dimensionality of RDKit descriptors and a bit- and count-based Morgan fingerprint(radius=3, nBits=2048) colored by odor strength in Figure S2, Figure S3, Figure S5, Figure S6 and colored by data set source in Figure S4.

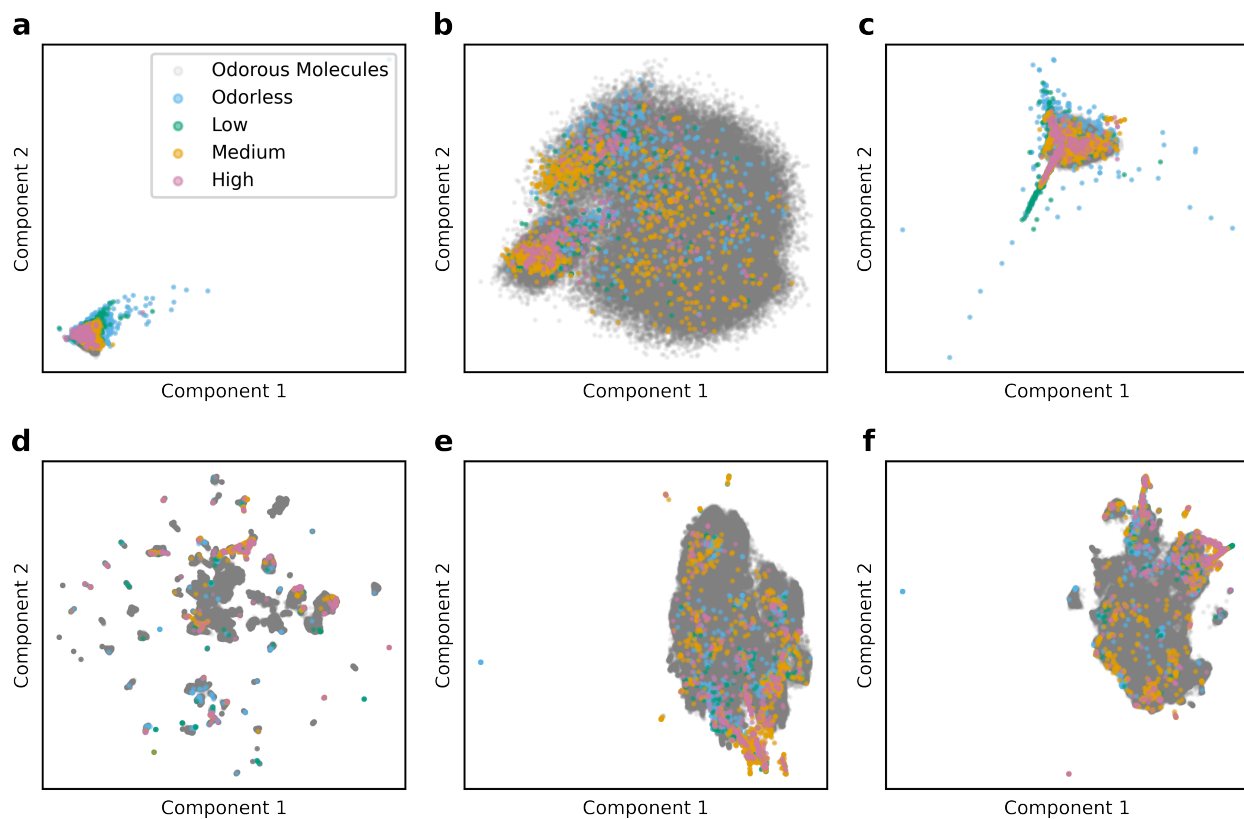

**Figure S2** 2D representation of our curated data set colored by their odor strength and the 52457 molecules (grey) of a downsample from the GDB-17 database<sup>2</sup> with a predicted odor probability of 50% or more according to the best-performing model from Mayhew *et al.*<sup>1</sup> using (a) PCA on RDKit Descriptors, (b) PCA on the bit-based Morgan fingerprint, (c) PCA on the count-based Morgan fingerprint, (d) UMAP on RDKit Descriptors, (e) UMAP on the bit-based Morgan fingerprint, (f) UMAP on the count-based Morgan Fingerprint. All Morgan fingerprints used a radius of 3 and a length of 2048. UMAP was performed with default hyperparameters.

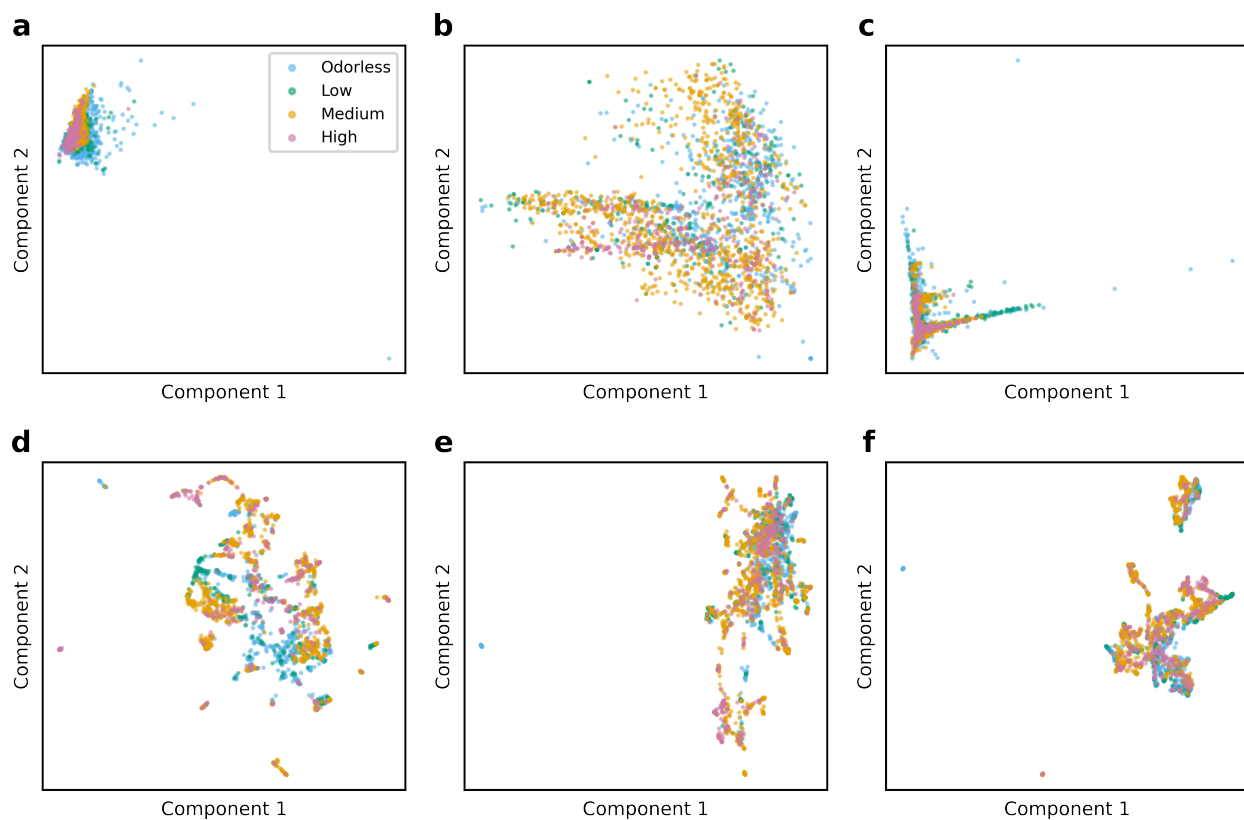

**Figure S3** 2D representation of our curated data set colored by their odor strength without an additional odor molecule background using (a) PCA on RDKit Descriptors, (b) PCA on the bit-based Morgan fingerprint, (c) PCA on the count-based Morgan fingerprint, (d) UMAP on RDKit Descriptors, (e) UMAP on the bit-based Morgan fingerprint, (f) UMAP on the count-based Morgan Fingerprint. All Morgan fingerprints used a radius of 3 and a length of 2048. UMAP was performed with default hyperparameters.

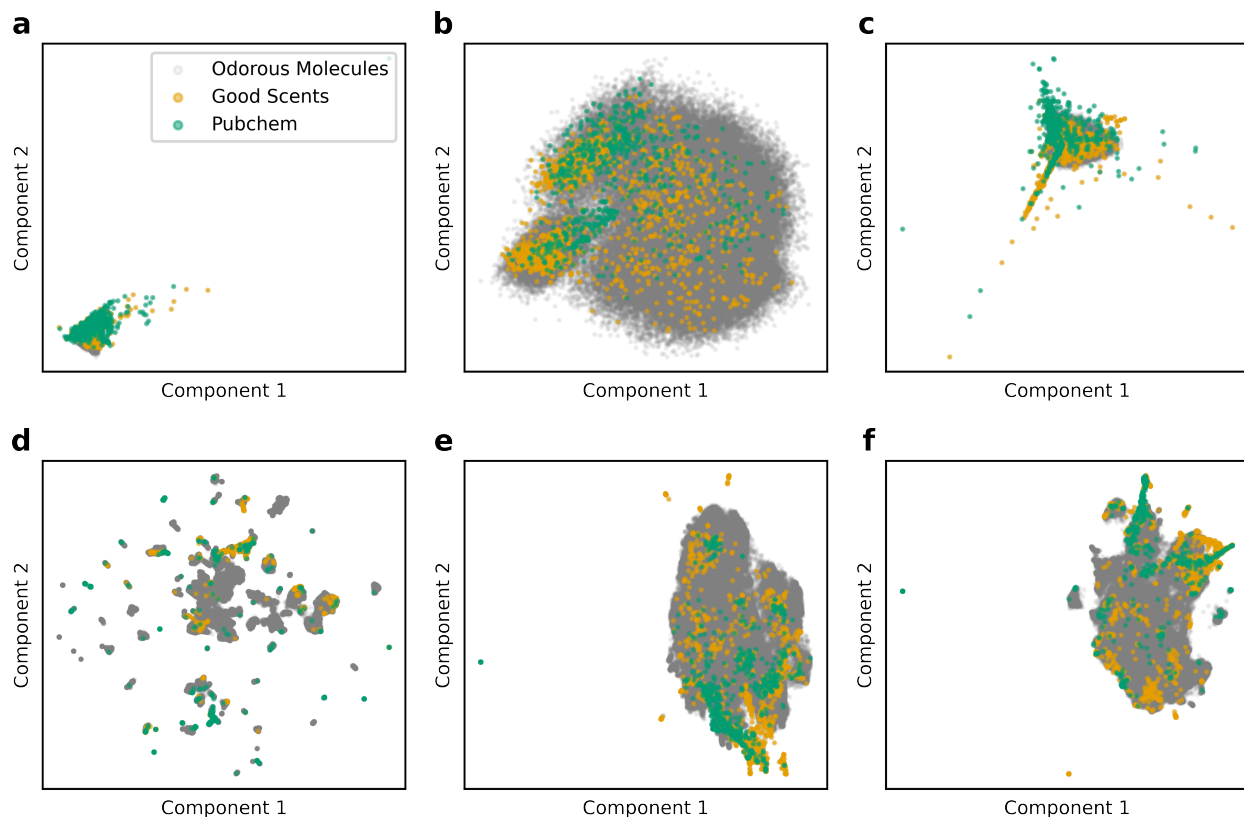

**Figure S4** 2D representation of our curated data set colored by their source data set and the 52457 molecules (grey) of a downsample from the GDB-17 database<sup>2</sup> with a predicted odor probability of 50% or more according to the best-performing model from Mayhew *et al.*<sup>1</sup> using (a) PCA on RDKit Descriptors, (b) PCA on the bit-based Morgan fingerprint, (c) PCA on the count-based Morgan fingerprint, (d) UMAP on RDKit Descriptors, (e) UMAP on the bit-based Morgan fingerprint, (f) UMAP on the count-based Morgan Fingerprint. All Morgan fingerprints used a radius of 3 and a length of 2048. UMAP was performed with default hyperparameters.

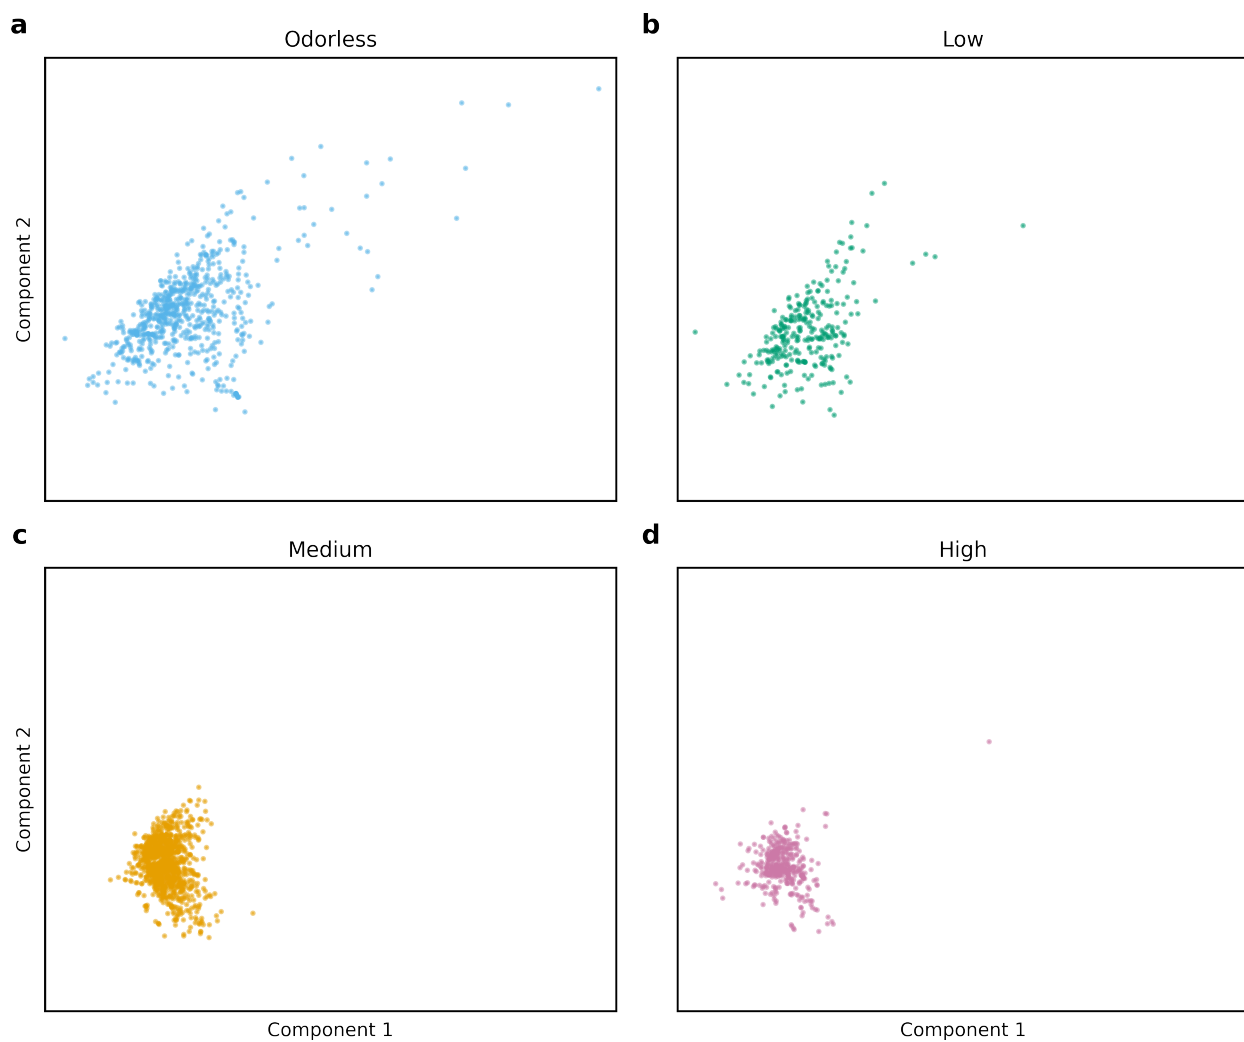

**Figure S5** 2D PCA of the RDKit descriptors of our curated data set and the 52457 molecules of a downsample from the GDB-17 database<sup>2</sup> with a predicted odor probability of 50% or more according to the best-performing model from Mayhew *et al.*<sup>1</sup>. (a) Odorless, (b) Low odor strength, (c) Medium odor strength, (d) High odor strength. Glucagon is not shown due to better visibility. A PCA with Glucagon is provided in Figure S2a.

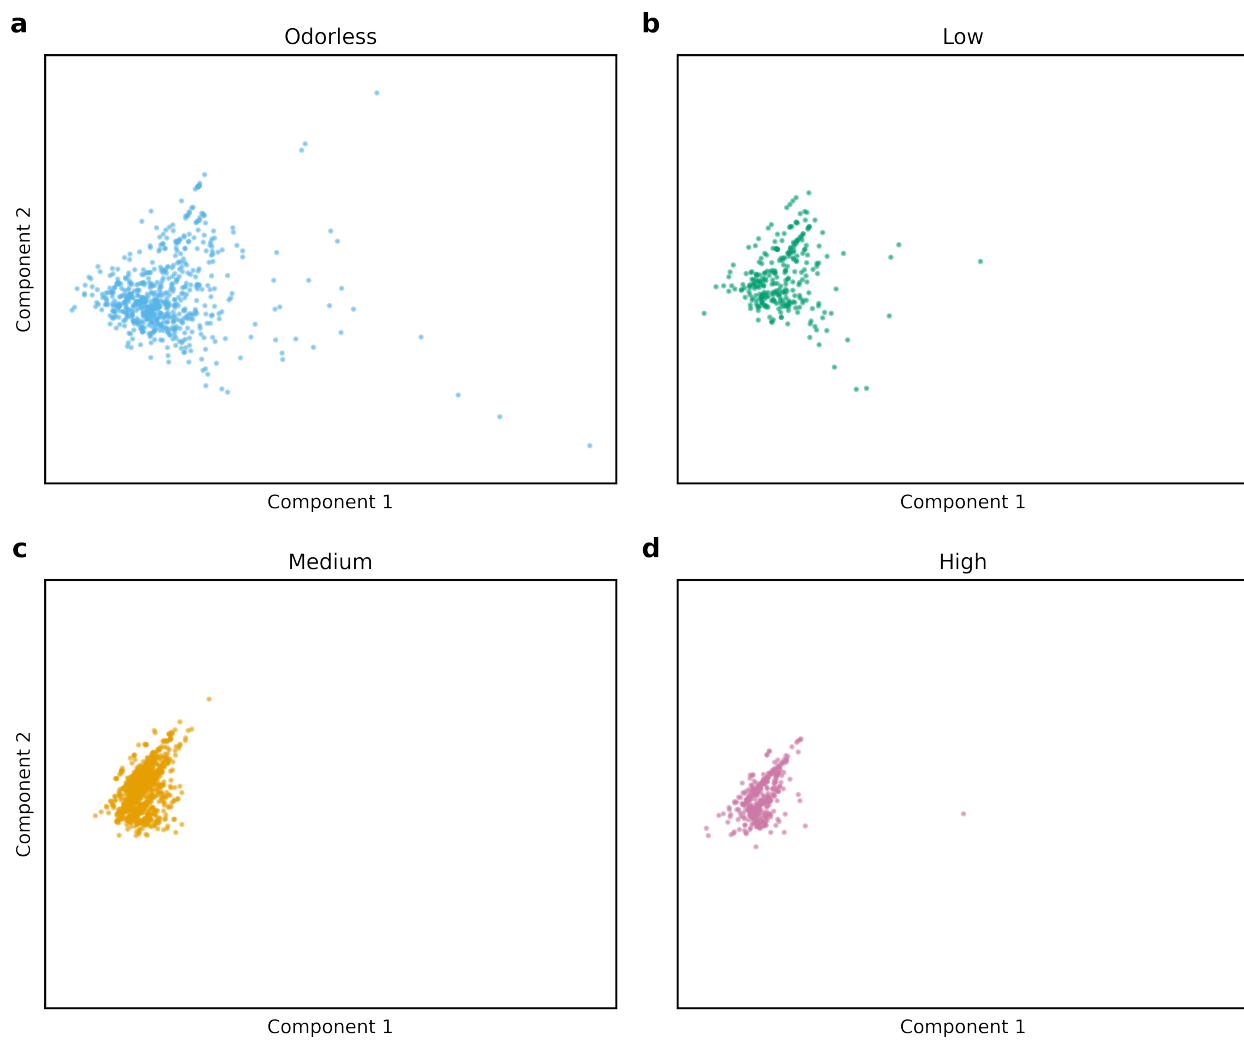

**Figure S6** 2D PCA of the RDKit descriptors of our curated data set. (a) Odorless, (b) Low odor strength, (c) Medium odor strength, (d) High odor strength. Glucagon is not shown due to better visibility. A PCA with Glucagon is provided in Figure S3a.

### S1.3 Clustering

In Table S2 we report the adjusted rand indices (ARIs)<sup>3</sup>, normalized mutual information (NMI)<sup>4</sup> and adjusted mutual information (AMI)<sup>5</sup> and silhouette scores<sup>6</sup> on our data set in comparison to the ground truth odor strengths of the investigated clustering algorithms K-means,<sup>7</sup> gaussian mixture models,<sup>8</sup> density-based spatial clustering of applications with noise (DBSCAN),<sup>9</sup> spectral<sup>10,11</sup> and agglomerative<sup>12</sup> clustering. For each method, we optimized key hyperparameters with respect to the adjusted rand index (ARI). The ARI is a chance-corrected measure of clustering performance compared to the ground truth ranging from 0 (random assignment) to 1 (perfect agreement). The NMI and AMI are based on mutual information and thus informational entropy. The AMI is chance-corrected while the NMI is not. Both also range from 0 (random assignment) to 1 (perfect agreement). The silhouette score corresponds to the tightness and separation of the clusters, ranging from -1 to 1 (best 1, 0 overlapping clusters). The silhouette scores reached values up to 1.0, but the ARIs, NMIs and AMIs were below 0.23. A 2D PCA RDKit Descriptors representation of the best clustering result regarding the ARI (ARI 0.23, NMI 0.17, AMI 0.17, silhouette score: 0.13) is shown in Figure S7.

**Table S2** Adjusted rand index (ARI), normalized mutual information (NMI), adjusted mutual information (AMI) and silhouette scores of 5 hyperparameter tuned clustering methods using bit-based (Morgan Binary) and count-based (Morgan Count) Morgan fingerprints (radius=3, nBits=2048) and RDKit Descriptors. The ARI, NMI and AMI were benchmarked against the odor strength categories.

| Descriptor        | Algorithm     | ARI   | NMI   | AMI   | Silhouette |
|-------------------|---------------|-------|-------|-------|------------|
| Morgan Binary     | K-Means       | 0.019 | 0.027 | 0.025 | -0.005     |
| Morgan Binary     | GMM           | 0.017 | 0.021 | 0.019 | -0.015     |
| Morgan Binary     | DBSCAN        | 0.009 | 0.036 | 0.029 | 1.000      |
| Morgan Binary     | Spectral      | 0.000 | 0.003 | 0.000 | 0.363      |
| Morgan Binary     | Agglomerative | 0.035 | 0.065 | 0.063 | 0.032      |
| Morgan Count      | K-Means       | 0.015 | 0.036 | 0.035 | 0.133      |
| Morgan Count      | GMM           | 0.040 | 0.045 | 0.043 | 0.149      |
| Morgan Count      | DBSCAN        | 0.069 | 0.092 | 0.084 | -0.047     |
| Morgan Count      | Spectral      | 0.000 | 0.003 | 0.001 | 0.595      |
| Morgan Count      | Agglomerative | 0.019 | 0.030 | 0.027 | 0.507      |
| RDKit Descriptors | K-Means       | 0.090 | 0.126 | 0.124 | 0.105      |
| RDKit Descriptors | GMM           | 0.228 | 0.173 | 0.171 | 0.132      |
| RDKit Descriptors | DBSCAN        | 0.004 | 0.034 | 0.027 | 0.649      |
| RDKit Descriptors | Spectral      | 0.000 | 0.003 | 0.000 | 0.473      |
| RDKit Descriptors | Agglomerative | 0.148 | 0.155 | 0.153 | 0.160      |

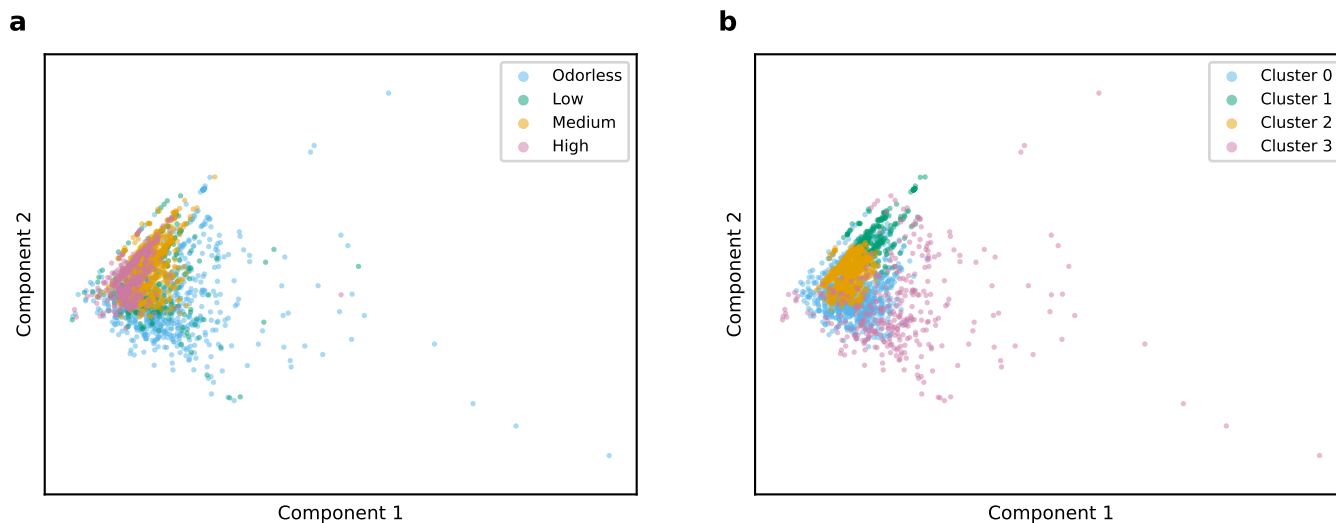

**Figure S7** Best clustering result. (a) 2D PCA of the RDKit Descriptors of our curated data set colored by their odor strength. (b) 2D PCA of the RDKit Descriptors of our curated data set colored by the clusters of a gaussian mixture model, our best-performing clustering algorithm (ARI 0.23, NMI 0.17, AMI 0.17, silhouette score: 0.13). In both figures, Glucagon is not shown due to better visibility. A PCA with Glucagon is provided in Figure S3a.

## S1.4 PCA loadings

The top 15 PCA loadings of the first two principal components are provided without odorous background in Table S3 and with in Table S4. In both cases, the first principal component can be attributed to molecular weight and shape and the second to heteroatoms and polarity.

**Table S3** Top 15 principal components loadings (PC1, PC2) of the principal component analysis on the RDKit Descriptors of our data set.

| Feature PC1         | PC1 Loading | Feature PC2             | PC2 Loading |
|---------------------|-------------|-------------------------|-------------|
| Chi0                | 0.151237    | NumAliphaticCarbocycles | 0.168427    |
| HeavyAtomCount      | 0.151045    | SPS                     | 0.165084    |
| NumValenceElectrons | 0.150523    | NumSaturatedCarbocycles | 0.157383    |
| Chi1                | 0.150153    | SlogP_VSA5              | 0.153872    |
| LabuteASA           | 0.149157    | VSA_EState8             | 0.147736    |
| ExactMolWt          | 0.148014    | SMR_VSA4                | 0.145841    |
| MolWt               | 0.147922    | SMR_VSA5                | 0.143812    |
| HeavyAtomMolWt      | 0.147150    | FractionCSP3            | 0.140981    |
| Chi0v               | 0.145032    | MolLogP                 | 0.139034    |
| Kappa1              | 0.144625    | Chi4n                   | 0.137100    |
| Chi0n               | 0.143977    | VSA_EState5             | 0.137054    |
| MolMR               | 0.142824    | BCUT2D_CHGLO            | -0.133288   |
| Chi1v               | 0.142211    | SlogP_VSA4              | 0.132119    |
| Chi1n               | 0.140139    | VSA_EState7             | 0.129794    |
| BertzCT             | 0.138781    | SlogP_VSA1              | -0.128953   |

**Table S4** Top 15 principal components loadings (PC1, PC2) of the principal component analysis on the RDKit Descriptors of our data set and more than 50000 probable odorous molecules (from the GDB-17 database<sup>2</sup> downsampled molecules with a odor probability of 50% or more which was predicted with the best-performing model according to<sup>1</sup>).

| Feature PC1         | PC1 Loading | Feature PC2             | PC2 Loading |
|---------------------|-------------|-------------------------|-------------|
| Chi1v               | 0.170719    | NumHeteroatoms          | 0.165858    |
| Chi1n               | 0.170210    | HallKierAlpha           | -0.163322   |
| NumValenceElectrons | 0.169873    | MinAbsPartialCharge     | 0.158415    |
| HeavyAtomCount      | 0.169435    | MaxPartialCharge        | 0.158190    |
| Chi1                | 0.167990    | NOCOUNT                 | 0.157602    |
| LabuteASA           | 0.167783    | SPS                     | -0.152631   |
| Chi2v               | 0.167572    | TPSA                    | 0.152097    |
| Chi2n               | 0.166337    | SMR_VSA10               | 0.148329    |
| Chi0n               | 0.164971    | NumAliphaticRings       | -0.144735   |
| Chi0v               | 0.164527    | NumSaturatedRings       | -0.142600   |
| ExactMolWt          | 0.164219    | NumHAcceptors           | 0.138035    |
| MolWt               | 0.164166    | NumAliphaticCarbocycles | -0.132778   |
| HeavyAtomMolWt      | 0.161262    | NumSaturatedCarbocycles | -0.127086   |
| Chi0                | 0.160783    | FractionCSP3            | -0.123140   |
| Chi3v               | 0.158750    | VSA_EState2             | 0.123060    |

## S2 Hyperparameter ranges

Here, we provide the type, options, sampling and further conditions of the tuned hyperparameters for each molecular encoder and predictor. Hyperparameters were optimized using the tree-structured Parzen estimator (TPE) via Optuna<sup>13</sup>.

### S2.1 Encoders

The tuned hyperparameters of the Morgan fingerprint<sup>14,15</sup> (Table S5), the RDKit fingerprint<sup>16</sup> (Table S6), the topological torsion fingerprint<sup>17</sup> (Table S7), the atom pair fingerprint<sup>18</sup> (Table S8) and ChemBERTa-2<sup>19</sup> (Table S9) are provided. No hyperparameters of the MACCS-keys fingerprint<sup>20</sup> and the RDKit descriptors<sup>16</sup> were tuned.

**Table S5** Morgan fingerprint optuna hyperparameter configuration.

| Hyperparameter          | Type               | Options          | Sampling |
|-------------------------|--------------------|------------------|----------|
| radius                  | integer            | 2, 3, 4          | uniform  |
| count                   | categorical (bool) | True, False      | uniform  |
| countSimulation         | categorical (bool) | True, False      | uniform  |
| fpSize                  | integer            | 1024, 1536, 2048 | uniform  |
| includeChirality        | categorical (bool) | True, False      | uniform  |
| useBondTypes            | categorical (bool) | True, False      | uniform  |
| atomInvariantsGenerator | categorical        | True, None       | uniform  |

**Table S6** RDKit fingerprint optuna hyperparameter configuration.

| Hyperparameter          | Type               | Options          | Sampling |
|-------------------------|--------------------|------------------|----------|
| count                   | categorical (bool) | True, False      | uniform  |
| countSimulation         | categorical (bool) | True, False      | uniform  |
| fpSize                  | integer            | 1024, 1536, 2048 | uniform  |
| atomInvariantsGenerator | categorical        | True, None       | uniform  |
| minPath                 | integer            | 1, 2, 3          | uniform  |
| maxPath                 | integer            | 5, 6, 7, 8, 9    | uniform  |
| useHs                   | categorical (bool) | True, False      | uniform  |
| branchedPaths           | categorical (bool) | True, False      | uniform  |
| useBondOrder            | categorical (bool) | True, False      | uniform  |
| numBitsPerFeature       | integer            | 1, 2, 3          | uniform  |

**Table S7** Topological torsion fingerprint optuna hyperparameter configuration.

| Hyperparameter   | Type               | Options          | Sampling |
|------------------|--------------------|------------------|----------|
| count            | categorical (bool) | True, False      | uniform  |
| countSimulation  | categorical (bool) | True, False      | uniform  |
| fpSize           | integer            | 1024, 1536, 2048 | uniform  |
| includeChirality | categorical (bool) | True, False      | uniform  |
| torsionAtomCount | integer            | 2, 3, 4, 5, 6    | uniform  |

### S2.2 Predictors

The tuned hyperparameters of the predictors logistic regression<sup>21</sup> (Table S10), random forest<sup>22</sup> (Table S11), extreme gradient boosting (XGBoost)<sup>23</sup> (Table S12), multi-layer-perceptron (MLP)<sup>24,25</sup> and consistent rank logits (CORAL)<sup>26</sup> (Table S13) are provided. In addition, the message-passing neural network framework ChemProp<sup>27,28</sup> both with and without initialization from the foundational model CheMeleon<sup>29</sup> was optimized. The tested hyperparameters are in Table S14. No hyperparameters of the average prediction were tuned

**Table S8** Atom pair fingerprint optuna hyperparameter configuration.

| Hyperparameter          | Type               | Options          | Sampling |
|-------------------------|--------------------|------------------|----------|
| count                   | categorical (bool) | True, False      | uniform  |
| countSimulation         | categorical (bool) | True, False      | uniform  |
| minDistance             | integer            | 1, 2, 3          | uniform  |
| maxDistance             | integer            | 5, 6, 7, 8, 9    | uniform  |
| includeChirality        | categorical (bool) | True, False      | uniform  |
| fpSize                  | integer            | 1024, 1536, 2048 | uniform  |
| atomInvariantsGenerator | categorical        | True, None       | uniform  |

**Table S9** ChemBERTa optuna hyperparameter configuration.

| Hyperparameter | Type        | Options             | Sampling |
|----------------|-------------|---------------------|----------|
| target_layer   | integer     | 0, 1, 2, 3, 4, 5, 6 | uniform  |
| pooling        | categorical | 'mean', 'cls'       | uniform  |

**Table S10** Logistic regression optuna hyperparameter configuration.

| Hyperparameter             | Type               | Options                                             | Sampling                | Condition                           |
|----------------------------|--------------------|-----------------------------------------------------|-------------------------|-------------------------------------|
| standardizer_name          | categorical        | 'standard', 'robust', 'minmax', 'yeo-johnson', None | uniform                 | —                                   |
| penalty                    | categorical        | 'l2', 'l1', 'elasticnet', None                      | uniform                 | —                                   |
| tol                        | float              | 1e-5-1e-3                                           | log-uniform             | —                                   |
| C                          | float              | 1e-2-1e2                                            | log-uniform             | defined if penalty not None         |
| l1_ratio                   | float              | 0.1-0.9                                             | uniform (step size 0.1) | defined if penalty = 'elasticnet'   |
| solver                     | categorical        | 'liblinear', 'saga'                                 | uniform                 | if penalty = 'l1'                   |
| solver                     | categorical        | 'saga', 'newton-cg', 'lbfgs'                        | uniform                 | if penalty = None                   |
| solver                     | categorical        | 'liblinear', 'saga', 'newton-cg', 'lbfgs'           | uniform                 | if penalty = 'l2'                   |
| binarize_labels            | categorical (bool) | True, False                                         | uniform                 | if labels ordinal (not only binary) |
| dealing_with_inconsistency | categorical        | 'sum', 'max'                                        | uniform                 | defined if binarize_labels = True   |

**Table S11** Random forest optuna hyperparameter configuration.

| Hyperparameter             | Type               | Options                        | Sampling               | Condition                                                             |
|----------------------------|--------------------|--------------------------------|------------------------|-----------------------------------------------------------------------|
| objective                  | categorical        | 'classification', 'regression' | uniform                | —                                                                     |
| n_estimators               | integer            | 50-500                         | uniform (step size 50) | —                                                                     |
| max_depth                  | integer            | 5-20                           | uniform (step size 5)  | —                                                                     |
| min_samples_split          | integer            | 2, 3, 4                        | uniform                | —                                                                     |
| min_samples_leaf           | integer            | 1, 3, 5                        | uniform                | —                                                                     |
| min_weight_fraction_leaf   | float              | 0.0, 0.2, 0.4                  | uniform                | —                                                                     |
| max_features               | categorical        | 'sqrt', 'log2', None           | uniform                | —                                                                     |
| max_leaf_nodes             | integer            | 25, 50, 75, 100                | uniform                | —                                                                     |
| min_impurity_decrease      | float              | 0.0, 0.05, 0.1                 | uniform                | —                                                                     |
| criterion                  | categorical        | 'gini', 'entropy', 'log_loss'  | uniform                | if objective = 'classification'                                       |
| binarize_labels            | categorical (bool) | True, False                    | uniform                | if objective = 'classification' and labels ordinary (not only binary) |
| dealing_with_inconsistency | categorical        | 'sum', 'max'                   | uniform                | if binarize_labels = True                                             |

**Table S12** XGBoost Hyperparameter Space with Conditional Dependencies

| Hyperparameter             | Type                  | Options                                                      | Sampling    | Condition                                                    |
|----------------------------|-----------------------|--------------------------------------------------------------|-------------|--------------------------------------------------------------|
| objective                  | categorical           | 'binary:logistic',<br>'multi:softmax',<br>'reg:squarederror' | uniform     | only binary labels: always 'binary:logistic'                 |
| custom_metric              | fixed                 | 'mse_macro'<br>'f1_score'                                    | or —        | only binary labels: 'f1_score'; ordinary labels: 'mse_macro' |
| booster                    | categorical           | 'gbtree', 'dart'                                             | uniform     | —                                                            |
| num_boost_round            | fixed                 | 250                                                          | —           | —                                                            |
| early_stopping_rounds      | fixed                 | 50                                                           | —           | —                                                            |
| eta                        | float                 | 0.005-0.5                                                    | log-uniform | —                                                            |
| lambda                     | float                 | 0.001-10                                                     | log-uniform | —                                                            |
| alpha                      | float                 | 0.001-10                                                     | log-uniform | —                                                            |
| gamma                      | float                 | 0.001-10                                                     | log-uniform | —                                                            |
| max_depth                  | integer               | 4, 6, 8, 10                                                  | uniform     | —                                                            |
| min_child_weight           | float                 | 0.01-100                                                     | log-uniform | —                                                            |
| max_delta_step             | float                 | 0, 1, 2                                                      | uniform     | —                                                            |
| subsample                  | float                 | 0.6, 0.8, 1.0                                                | uniform     | —                                                            |
| colsample_bytree           | float                 | 0.6, 0.8, 1.0                                                | uniform     | —                                                            |
| colsample_bylevel          | float                 | 0.6, 0.8, 1.0                                                | uniform     | —                                                            |
| num_parallel_tree          | integer               | 1, 2, 3                                                      | uniform     | —                                                            |
| rate_drop                  | float                 | 0.0, 0.2, 0.4                                                | uniform     | booster = 'dart'                                             |
| skip_drop                  | float                 | 0.0, 0.2, 0.4                                                | uniform     | booster = 'dart'                                             |
| normalize_type             | categorical           | 'tree', 'forest'                                             | uniform     | booster = 'dart'                                             |
| sample_type                | categorical           | 'uniform', 'weighted'                                        | uniform     | booster = 'dart'                                             |
| binarize_labels            | categorical<br>(bool) | True, False                                                  | uniform     | if labels ordinal (not only binary)                          |
| dealing_with_inconsistency | categorical           | 'sum', 'max'                                                 | uniform     | if binarize_labels = True                                    |
| multi_strategy             | categorical           | 'one_output_per_tree',<br>'multi_output_tree'                | uniform     | if binarize_labels = True and<br>booster = 'gbtree'          |
| num_class                  | fixed                 | 4                                                            | —           | if objective = 'multi:softmax'                               |

**Table S13** MLP and CORAL predictor optuna hyperparameter configuration.

| Hyperparameter             | Type                | Options                                                                       | Sampling                 | Condition                                                                             |
|----------------------------|---------------------|-------------------------------------------------------------------------------|--------------------------|---------------------------------------------------------------------------------------|
| standardizer_name          | categorical         | 'standard', 'robust', 'minmax', 'yeo-johnson', None                           | uniform                  | —                                                                                     |
| n_layers                   | integer             | 2-12                                                                          | uniform (step size 2)    | —                                                                                     |
| dim                        | integer             | 32-512                                                                        | log-uniform              | —                                                                                     |
| batch_size                 | categorical         | 16, 32, 64, 128, 256                                                          | uniform                  | —                                                                                     |
| n_epochs                   | fixed               | 250                                                                           | —                        | —                                                                                     |
| early_stopping_rounds      | fixed               | 50                                                                            | —                        | —                                                                                     |
| delta                      | fixed               | 0                                                                             | —                        | —                                                                                     |
| objective_name             | categorical         | 'binary_crossentropy', 'mse', 'coral'                                         | uniform                  | 'coral' only for CORAL predictor (fixed); if labels binary only 'binary_crossentropy' |
| learning_rate              | float               | 5e-6-5e-4                                                                     | log-uniform              | —                                                                                     |
| optimizer_name             | categorical         | 'adam', 'adamw', 'sgd', 'rmsprop', 'adagrad'                                  | uniform                  | —                                                                                     |
| training_scheduler_name    | categorical         | None, 'ReduceLRonPlateau', 'CosineAnnealingLR', 'CosineAnnealingWarmRestarts' | uniform                  | —                                                                                     |
| warmup_epochs              | integer             | 0, 10, 20, 30                                                                 | uniform                  | —                                                                                     |
| activation                 | categorical         | 'relu', 'leaky-relu', 'tanh', 'sigmoid', 'elu'                                | uniform                  | —                                                                                     |
| dropout                    | float               | 0.0-0.5                                                                       | uniform (step size 0.1)  | —                                                                                     |
| weight_average             | categorical         | False, 'swa', 'ema'                                                           | uniform                  | —                                                                                     |
| metric_name                | fixed               | 'mse_macro' or 'f1_score'                                                     | —                        | binary labels 'f1_score'; ordinary labels: 'mse_macro'                                |
| weight_decay               | float               | 1e-5-1e-3                                                                     | log-uniform              | —                                                                                     |
| betas                      | tuple(float, float) | beta1: 0.85, 0.90, 0.95, 0.996, 0.999<br>beta2: 0.990, 0.993, 0.996, 0.999    | uniform                  | if optimizer in ['adam', 'adamw']                                                     |
| momentum                   | float               | 0.0-0.5                                                                       | uniform (step size 0.1)  | if optimizer in ['sgd', 'rmsprop']                                                    |
| nesterov                   | categorical         | True, False                                                                   | uniform                  | if optimizer = 'sgd' and momentum > 0                                                 |
| dampening                  | float               | 0.0, 0.05, 0.1                                                                | uniform                  | if optimizer = 'sgd' and nesterov = False                                             |
| alpha                      | float               | 0.9-0.99                                                                      | uniform (step size 0.03) | if optimizer = 'rmsprop'                                                              |
| lr_decay                   | float               | 0.0, 0.05, 0.1                                                                | uniform                  | if optimizer = 'adagrad'                                                              |
| factor                     | float               | 0.1-0.5]                                                                      | uniform (step size 0.1)  | if scheduler = 'ReduceLRonPlateau'                                                    |
| T_0                        | integer             | 10, 20, 30, 40                                                                | uniform                  | if scheduler = 'CosineAnnealingWarmRestarts'                                          |
| T_mult                     | integer             | 2, 3, 4                                                                       | uniform                  | if scheduler = 'CosineAnnealingWarmRestarts'                                          |
| binarize_labels            | categorical (bool)  | True, False                                                                   | uniform                  | if labels ordinal (not only binary)                                                   |
| dealing_with_inconsistency | categorical         | 'sum', 'max'                                                                  | uniform                  | if binarize_labels = True                                                             |

**Table S14** ChemProp and CheMeleon MPNN predictor optuna hyperparameter configuration.

| Hyperparameter               | Type               | Options                                     | Sampling                | Condition                                          |
|------------------------------|--------------------|---------------------------------------------|-------------------------|----------------------------------------------------|
| epochs                       | fixed              | 250 ChemProp, 100 CheMeleon                 | —                       | —                                                  |
| early_stopping_rounds        | fixed              | 50 ChemProp, 25 CheMeleon                   | —                       | —                                                  |
| delta                        | fixed              | 0                                           | —                       | —                                                  |
| mode                         | fixed              | 'min'                                       | —                       | —                                                  |
| batch_size                   | categorical        | 16, 32, 64, 128, 256                        | uniform                 | —                                                  |
| aggregation                  | categorical        | 'norm', 'sum', 'mean', 'attentive'          | uniform                 | —                                                  |
| n_layers                     | integer            | 1–12                                        | uniform                 | —                                                  |
| objective                    | categorical        | 'binary_crossentropy', 'mse'                | uniform                 | if labels binary only 'binary_crossentropy'        |
| predictor_dim                | integer            | 32–512                                      | log-uniform             | —                                                  |
| predictor_dropout            | float              | 0.0–0.5                                     | uniform (step size 0.1) | —                                                  |
| predictor_activation         | categorical        | 'relu', 'leakyrelu', 'prelu', 'tanh', 'elu' | uniform                 | —                                                  |
| warmup_epochs                | integer            | 0, 10, 20, 30                               | uniform                 | —                                                  |
| initial_learning_rate        | float              | 5e-6–1e-3                                   | log-uniform             | —                                                  |
| max_learning_rate_factor     | float              | 1–100                                       | log-uniform             | used to compute max_learning_rate                  |
| final_learning_rate_factor   | float              | 0.01–10                                     | log-uniform             | used to compute final_learning_rate                |
| max_learning_rate            | derived            | —                                           | —                       | initial_learning_rate × max_learning_rate_factor   |
| final_learning_rate          | derived            | —                                           | —                       | initial_learning_rate × final_learning_rate_factor |
| message_passing              | categorical        | 'bond', 'chameleon', 'atom'                 | uniform                 | 'chameleon' only for CheMeleon predictor (fixed)   |
| mp_dim                       | integer            | 32–512                                      | log-uniform             | only ChemProp predictor                            |
| bias                         | categorical (bool) | True, False                                 | uniform                 | only ChemProp predictor                            |
| n_message_passing_iterations | integer            | 1–8                                         | uniform                 | only ChemProp predictor                            |
| messages_undirected_edges    | categorical (bool) | True, False                                 | uniform                 | only ChemProp predictor                            |
| mp_dropout                   | float              | 0.0–0.5                                     | uniform (step size 0.1) | only ChemProp predictor                            |
| mp_activation                | categorical        | 'relu', 'leakyrelu', 'prelu', 'tanh', 'elu' | uniform                 | only ChemProp predictor                            |
| binarize_labels              | categorical (bool) | True, False                                 | uniform                 | if labels ordinal (not only binary)                |
| dealing_with_inconsistency   | categorical        | 'sum', 'max'                                | uniform                 | if binarize_labels = True                          |

### S3 Direct and indirect approach model performance

Results of odor strength prediction using the indirect approach, consisting of two models to predict first whether a molecule is odorous and if so to predict its odor strength, are further shown in this section. The results of 5x2 cross-validation paired t-tests between the direct and indirect models of the same descriptor-predictor combinations are reported in Table S15. The direct approach was significant better in 19 of 30 cases (confidence interval 95%). Further 5x2 cross-validation paired t-tests between the 5 models with lowest macro MSE in hyperparameter optimization of the direct approach were performed. The result are shown in Table S16. Four models showed no significant differences in performance (confidence interval 95%).

The validation results on the test set are provided in Table S17 for the direct and in Table S18 for the indirect approach. The metrics including further class-specific metrics of the direct ensemble model (RDKit Descriptors with MLP, Random Forest, XGB) are reported in Table S19.

Figure S8, Figure S9 and Figure S10 provide a comparison of the first, second and combined steps of the indirect approach, respectively, across the tested algorithms for molecular encoding and odor prediction. The macro MSE difference to the direct approach is shown in Figure S11.

**Table S15** 5x2-Cross validation paired t-test results between the same descriptor-predictor combinations of the direct and combined indirect approach. A p-value below 0.05 is rejecting the null hypothesis that both models perform equally well with a confidence interval of 95%.

| Descriptor             | Predictor           | t value | p value |
|------------------------|---------------------|---------|---------|
| None                   | ChemProp            | -2.05   | 0.10    |
| None                   | CheMeleon           | -4.11   | 0.01    |
| RDKit Descriptors      | Random Forest       | -2.38   | 0.06    |
| RDKit Descriptors      | XGBoost             | -5.32   | 0.00    |
| RDKit Descriptors      | MLP                 | -1.40   | 0.22    |
| RDKit Descriptors      | Logistic Regression | -2.52   | 0.05    |
| Morgan FP              | Random Forest       | -2.39   | 0.06    |
| Morgan FP              | XGBoost             | -10.70  | 0.00    |
| Morgan FP              | MLP                 | -48.08  | 0.00    |
| Morgan FP              | Logistic Regression | -2.10   | 0.09    |
| RDKit FP               | Random Forest       | -8.45   | 0.00    |
| RDKit FP               | XGBoost             | -4.69   | 0.01    |
| RDKit FP               | MLP                 | 0.97    | 0.38    |
| RDKit FP               | Logistic Regression | -22.47  | 0.00    |
| Topological Torsion FP | Random Forest       | -6.38   | 0.00    |
| Topological Torsion FP | XGBoost             | -18.03  | 0.00    |
| Topological Torsion FP | MLP                 | -1.27   | 0.26    |
| Topological Torsion FP | Logistic Regression | -6.56   | 0.00    |
| Atom Pair FP           | Random Forest       | -1.95   | 0.11    |
| Atom Pair FP           | XGBoost             | -1.90   | 0.12    |
| Atom Pair FP           | MLP                 | -3.04   | 0.03    |
| Atom Pair FP           | Logistic Regression | -2.61   | 0.05    |
| MACCCS Keys FP         | Random Forest       | -7.54   | 0.00    |
| MACCCS Keys FP         | XGBoost             | -7.72   | 0.00    |
| MACCCS Keys FP         | MLP                 | -3.20   | 0.02    |
| MACCCS Keys FP         | Logistic Regression | -3.02   | 0.03    |
| ChemBERTa              | Random Forest       | -1.94   | 0.11    |
| ChemBERTa              | XGBoost             | -3.37   | 0.02    |
| ChemBERTa              | MLP                 | -3.32   | 0.02    |
| ChemBERTa              | Logistic Regression | -0.10   | 0.93    |

**Table S16** 5x2-Cross validation paired t-test p-values between the 4 models with the lowest macro MSE in hyperparameter optimization of the direct approach. A p-value below 0.05 is rejecting the null hypothesis that both models perform equally well with a confidence interval of 95%.

|                                   | RDKit Descriptors  <br>Random Forest | RDKit Descriptors  <br>MLP | RDKit Descriptors  <br>XGBoost | None  <br>CheMeleon |
|-----------------------------------|--------------------------------------|----------------------------|--------------------------------|---------------------|
| RDKit Descriptors   Random Forest | –                                    | 0.95                       | 0.89                           | 0.73                |
| RDKit Descriptors   MLP           | 0.95                                 | –                          | 0.96                           | 0.55                |
| RDKit Descriptors   XGBoost       | 0.89                                 | 0.96                       | –                              | 0.75                |
| None   CheMeleon                  | 0.73                                 | 0.55                       | 0.75                           | –                   |

**Table S17** Performance metrics of the descriptor-predictor combinations of the direct approach on the test set. Note that under this multi-class conditions the F1 score is identical to classification accuracy. The ROC AUC is calculated as sum of multiple binary problems in an ordinal one-vs-rest method.<sup>2</sup>

| Descriptor             | Predictor           | MSE macro | MSE micro | F1 macro | Accuracy/F1 micro | ROC AUC |
|------------------------|---------------------|-----------|-----------|----------|-------------------|---------|
| Atom Pair FP           | CORAL               | 0.64      | 0.51      | 0.62     | 0.70              | 0.86    |
| Atom Pair FP           | Logistic Regression | 0.66      | 0.59      | 0.58     | 0.61              | 0.85    |
| Atom Pair FP           | MLP                 | 0.54      | 0.45      | 0.64     | 0.70              | 0.89    |
| Atom Pair FP           | Random Forest       | 0.53      | 0.42      | 0.54     | 0.62              | 0.90    |
| Atom Pair FP           | XGBoost             | 0.55      | 0.43      | 0.63     | 0.69              | 0.88    |
| ChemBERTa              | CORAL               | 0.73      | 0.59      | 0.52     | 0.65              | 0.82    |
| ChemBERTa              | Logistic Regression | 0.89      | 0.73      | 0.49     | 0.55              | 0.79    |
| ChemBERTa              | MLP                 | 0.76      | 0.55      | 0.43     | 0.60              | 0.85    |
| ChemBERTa              | Random Forest       | 0.74      | 0.60      | 0.52     | 0.61              | 0.81    |
| ChemBERTa              | XGBoost             | 0.69      | 0.53      | 0.51     | 0.58              | 0.85    |
| MACCCS Keys FP         | CORAL               | 0.71      | 0.57      | 0.59     | 0.67              | 0.85    |
| MACCCS Keys FP         | Logistic Regression | 0.68      | 0.55      | 0.58     | 0.64              | 0.84    |
| MACCCS Keys FP         | MLP                 | 0.58      | 0.43      | 0.38     | 0.62              | 0.90    |
| MACCCS Keys FP         | Random Forest       | 0.55      | 0.41      | 0.58     | 0.64              | 0.90    |
| MACCCS Keys FP         | XGBoost             | 0.54      | 0.46      | 0.65     | 0.70              | 0.88    |
| Morgan FP              | CORAL               | 0.77      | 0.63      | 0.56     | 0.65              | 0.83    |
| Morgan FP              | Logistic Regression | 0.73      | 0.60      | 0.50     | 0.59              | 0.81    |
| Morgan FP              | MLP                 | 0.62      | 0.47      | 0.62     | 0.66              | 0.88    |
| Morgan FP              | Random Forest       | 0.62      | 0.51      | 0.48     | 0.59              | 0.84    |
| Morgan FP              | XGBoost             | 0.58      | 0.42      | 0.46     | 0.62              | 0.90    |
| None                   | ChemProp            | 0.58      | 0.51      | 0.61     | 0.64              | 0.88    |
| None                   | CheMeleon           | 0.53      | 0.36      | 0.50     | 0.69              | 0.91    |
| RDKit Descriptors      | CORAL               | 0.59      | 0.48      | 0.61     | 0.70              | 0.87    |
| RDKit Descriptors      | Logistic Regression | 0.63      | 0.52      | 0.57     | 0.65              | 0.84    |
| RDKit Descriptors      | MLP                 | 0.51      | 0.44      | 0.66     | 0.71              | 0.89    |
| RDKit Descriptors      | Random Forest       | 0.52      | 0.39      | 0.63     | 0.72              | 0.88    |
| RDKit Descriptors      | XGBoost             | 0.52      | 0.40      | 0.64     | 0.71              | 0.89    |
| RDKit FP               | CORAL               | 0.76      | 0.61      | 0.59     | 0.67              | 0.84    |
| RDKit FP               | Logistic Regression | 0.84      | 0.73      | 0.56     | 0.61              | 0.81    |
| RDKit FP               | MLP                 | 0.69      | 0.61      | 0.62     | 0.66              | 0.85    |
| RDKit FP               | Random Forest       | 0.63      | 0.52      | 0.58     | 0.64              | 0.86    |
| RDKit FP               | XGBoost             | 0.63      | 0.52      | 0.65     | 0.72              | 0.86    |
| Topological Torsion FP | CORAL               | 0.64      | 0.51      | 0.57     | 0.68              | 0.87    |
| Topological Torsion FP | Logistic Regression | 0.74      | 0.65      | 0.57     | 0.61              | 0.84    |
| Topological Torsion FP | MLP                 | 0.61      | 0.54      | 0.61     | 0.64              | 0.88    |
| Topological Torsion FP | Random Forest       | 0.71      | 0.56      | 0.48     | 0.57              | 0.86    |
| Topological Torsion FP | XGBoost             | 0.60      | 0.52      | 0.62     | 0.67              | 0.86    |

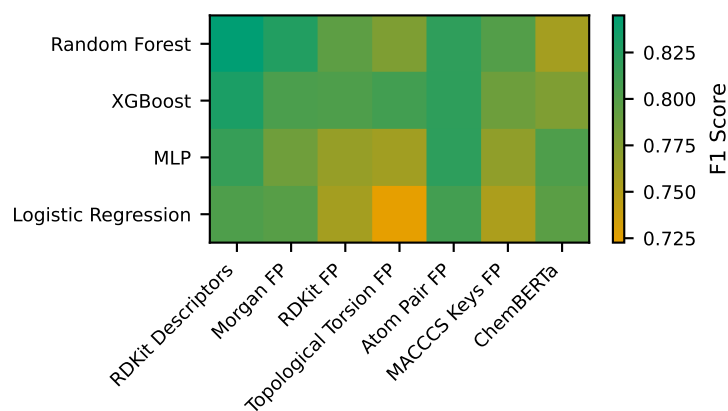

**Figure S8** Model performance first step of the indirect approach (binary classifier). F1-score (target minority class) of the hold-out test set of all combinations of molecule encoder (bottom) and predictor (left). MLP is multi-layer-perceptron and FP fingerprint. The message passing neural network ChemProp<sup>27,28</sup> achieved an F1-score of 0.81, and the foundational model CheMeleon<sup>29</sup> of 0.83.

**Table S18** Performance metrics of the descriptor-predictor combinations of the combined indirect approach (identical descriptor-predictor combination in both steps) on the test set. Note that under this multi-class conditions the F1 score is identical to classification accuracy. The ROC AUC is calculated as sum of multiple binary problems in an ordinal one-vs-rest method.<sup>?</sup>

| Descriptor             | Predictor           | MSE macro | MSE micro | F1 macro | Accuracy/F1 micro | ROC AUC |
|------------------------|---------------------|-----------|-----------|----------|-------------------|---------|
| Atom Pair FP           | Logistic Regression | 0.67      | 0.56      | 0.65     | 0.71              | 0.87    |
| Atom Pair FP           | MLP                 | 0.59      | 0.41      | 0.63     | 0.69              | 0.91    |
| Atom Pair FP           | Random Forest       | 0.71      | 0.48      | 0.57     | 0.70              | 0.88    |
| Atom Pair FP           | XGBoost             | 0.68      | 0.44      | 0.58     | 0.67              | 0.89    |
| ChemBERTa              | Logistic Regression | 0.93      | 0.77      | 0.55     | 0.61              | 0.83    |
| ChemBERTa              | MLP                 | 0.85      | 0.61      | 0.53     | 0.58              | 0.86    |
| ChemBERTa              | Random Forest       | 0.85      | 0.64      | 0.48     | 0.64              | 0.84    |
| ChemBERTa              | XGBoost             | 0.83      | 0.58      | 0.51     | 0.63              | 0.85    |
| MACCCS Keys FP         | Logistic Regression | 0.81      | 0.67      | 0.56     | 0.66              | 0.86    |
| MACCCS Keys FP         | MLP                 | 0.75      | 0.63      | 0.56     | 0.55              | 0.85    |
| MACCCS Keys FP         | Random Forest       | 0.73      | 0.60      | 0.61     | 0.69              | 0.86    |
| MACCCS Keys FP         | XGBoost             | 0.68      | 0.47      | 0.57     | 0.67              | 0.89    |
| Morgan FP              | Logistic Regression | 0.87      | 0.69      | 0.59     | 0.68              | 0.84    |
| Morgan FP              | MLP                 | 0.77      | 0.56      | 0.57     | 0.67              | 0.87    |
| Morgan FP              | Random Forest       | 0.71      | 0.56      | 0.63     | 0.74              | 0.86    |
| Morgan FP              | XGBoost             | 0.59      | 0.40      | 0.57     | 0.69              | 0.90    |
| None                   | ChemProp            | 0.71      | 0.46      | 0.57     | 0.66              | 0.89    |
| None                   | CheMeleon           | 0.62      | 0.39      | 0.63     | 0.73              | 0.91    |
| RDKit Descriptors      | Logistic Regression | 0.72      | 0.61      | 0.62     | 0.69              | 0.86    |
| RDKit Descriptors      | MLP                 | 0.58      | 0.42      | 0.61     | 0.68              | 0.89    |
| RDKit Descriptors      | Random Forest       | 0.58      | 0.39      | 0.60     | 0.70              | 0.90    |
| RDKit Descriptors      | XGBoost             | 0.59      | 0.37      | 0.60     | 0.69              | 0.91    |
| RDKit FP               | Logistic Regression | 0.99      | 0.85      | 0.61     | 0.66              | 0.81    |
| RDKit FP               | MLP                 | 0.78      | 0.57      | 0.57     | 0.64              | 0.87    |
| RDKit FP               | Random Forest       | 0.87      | 0.60      | 0.55     | 0.69              | 0.85    |
| RDKit FP               | XGBoost             | 0.67      | 0.45      | 0.57     | 0.68              | 0.89    |
| Topological Torsion FP | Logistic Regression | 0.88      | 0.79      | 0.57     | 0.62              | 0.84    |
| Topological Torsion FP | MLP                 | 0.80      | 0.59      | 0.53     | 0.58              | 0.87    |
| Topological Torsion FP | Random Forest       | 0.80      | 0.61      | 0.51     | 0.65              | 0.85    |
| Topological Torsion FP | XGBoost             | 0.62      | 0.41      | 0.56     | 0.69              | 0.89    |

**Table S19** Performance metrics of the ensemble model of the direct approach (RDKit Descriptors with MLP, Random Forest, XGB) including class specific metrics. Note that under this multi-class conditions the F1 score is identical to classification accuracy. The ROC AUC is calculated as sum of multiple binary problems in an ordinal one-vs-rest method.<sup>?</sup> We report the thresholds (low: larger equal low, medium: larger equal medium, high: larger equal high).

| Metric                   | Metric value |
|--------------------------|--------------|
| MSE Macro                | 0.49         |
| MSE Odorless             | 0.44         |
| MSE Low                  | 0.72         |
| MSE Medium               | 0.17         |
| MSE High                 | 0.64         |
| MSE Micro                | 0.35         |
| F1 Macro                 | 0.66         |
| F1 Odorless              | 0.83         |
| F1 Low                   | 0.44         |
| F1 Medium                | 0.79         |
| F1 High                  | 0.57         |
| Accuracy/F1 Micro        | 0.72         |
| ROC AUC                  | 0.91         |
| ROC AUC Low Threshold    | 0.94         |
| ROC AUC Medium Threshold | 0.94         |
| ROC AUC High Threshold   | 0.85         |

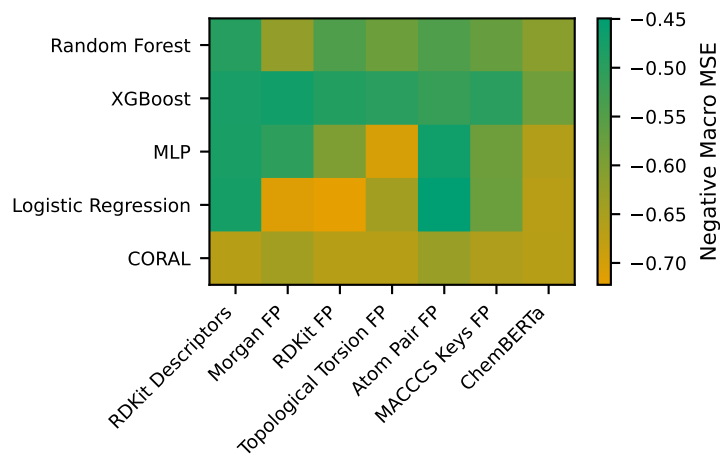

**Figure S9** Model performance second step of the indirect approach. Macro averaged mean squared error (MSE) over the categories of the hold-out test set of all combinations of molecule encoder (bottom) and predictor (left). MLP is multi-layer-perceptron and FP fingerprint. The message passing neural network using ChemProp<sup>27,28</sup> achieved a score of 0.52, and the foundational model CheMeleon<sup>29</sup> of 0.43.

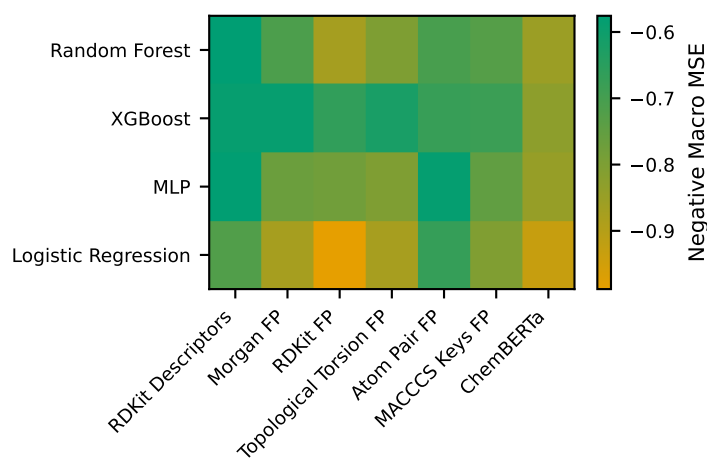

**Figure S10** Model performance combined steps of the indirect approach. Macro averaged mean squared error (MSE) over the categories of the hold-out test set of the cross-validation for the best hyperparameter optimized models of the same model combinations between the steps (molecule encoder (bottom) and predictor (left)). MLP is multi-layer-perceptron and FP fingerprint. The message passing neural network using ChemProp<sup>27,28</sup> achieved a score of 0.71, and the foundational model CheMeleon<sup>29</sup> of 0.62.

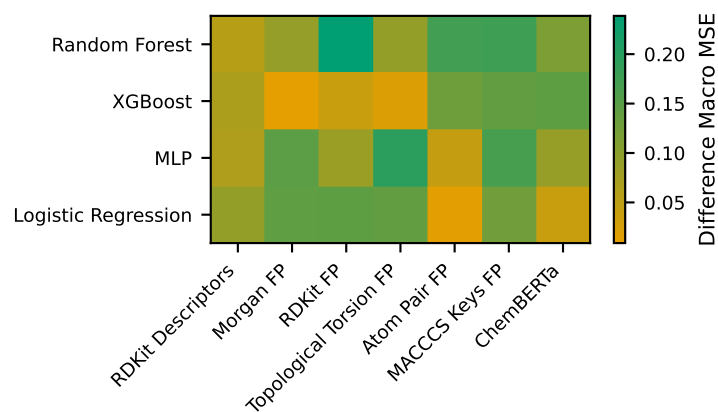

**Figure S11** Differences in macro MSE between the indirect and direct approach models on the hold-out test set (direct subtracted from indirect). For each combination of molecular encoder (bottom) and predictor (left), the macro MSE of the direct model was subtracted from the indirect model of the same model combinations. MLP is multi-layer-perceptron and FP fingerprint. The difference regarding the message passing neural network using ChemProp<sup>27,28</sup> was 0.13, and the foundational model CheMeleon<sup>29</sup> 0.09.

#### S4 Direct ensemble model validation

Here, we provide Figure S12, which shows normed violin plots of experimental intensity ratings in comparison to our direct ensemble model predictions of the same molecules. It demonstrates the performance of our model on an independent hold-out test set of intensity ratings from Keller *et al.*<sup>30</sup> at a range of dilutions from  $10^{-3}$  to  $10^{-7}$ . The trend is similar to the lower dilution level in the main part: an increase in predicted odor strength correlates with a higher odor intensity rating. In addition, the plot shows a limitation of the model at low dilution ( $10^{-1}$ ), where no trend was observed.

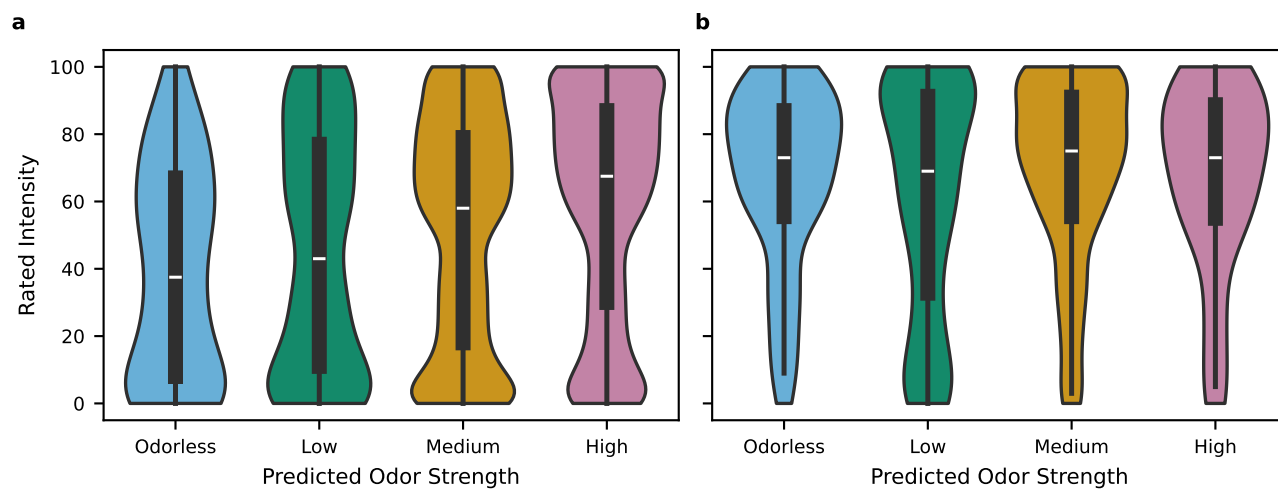

**Figure S12** Area normed violin plots of the direct ensemble model predictions of the novel molecules from Keller *et al.*<sup>30</sup> and their rated intensities (from 0 to 100) at a)  $10^{-3}$ ,  $10^{-5}$  and  $10^{-7}$  and b)  $10^{-1}$  dilution.

## S5 SHAP feature importance analysis

We wanted to investigate feature importance of our direct ensemble model (RDKit Descriptors with MLP, Random Forest and XGB). However, we identified several correlated features as shown in Figure S13. Consequently, we grouped highly correlated features (correlation threshold 0.75) via agglomerative clustering. A correlation threshold of 0.75 was chosen due to a maximum of the silhouette score<sup>6</sup> (0.33) at this threshold. The silhouette scores for a range of thresholds are shown in Figure S14. The SHAP (SHapley Additive exPlanations) values on the test set (train set as background) of each feature of the five most influential groups are shown in Figure S15 (Weight and Shape), Figure S16 (Polarity), Figure S17 (Nitrogen-Polarity), Figure S18 (Alcohol Groups) and Figure S19 (Morgan Fingerprint Density). Figure S20 shows the SHAP feature importance of these groups per predicted odor strengths.

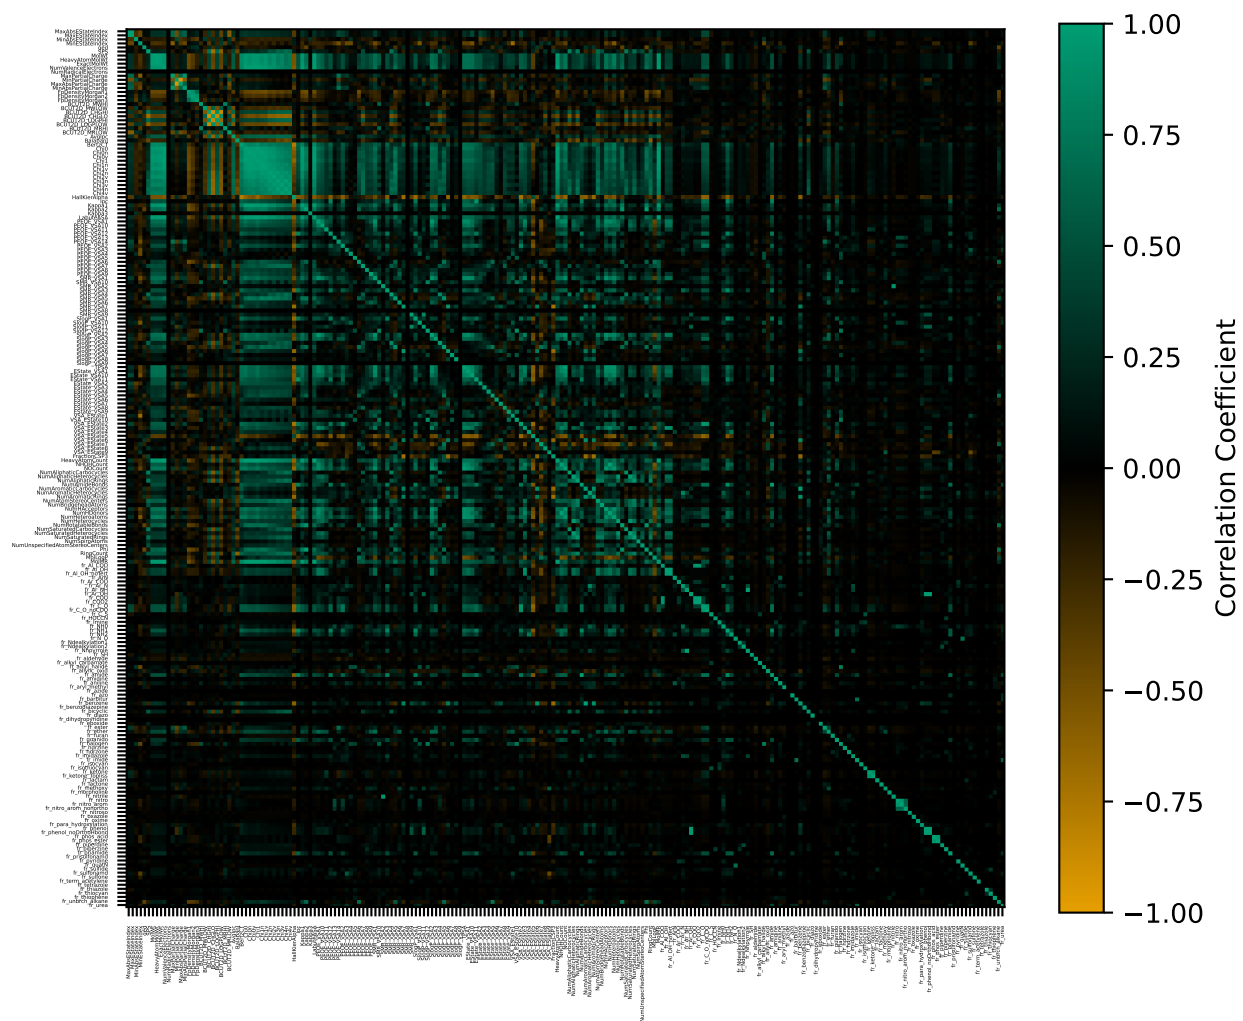

**Figure S13** Correlation matrix of the 217 RDKit Descriptors of the molecules of our data set.

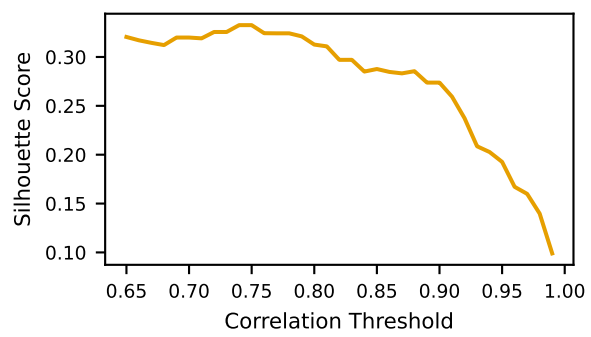

**Figure S14** Silhouette scores for a range of correlation thresholds to cluster via agglomerative clustering.

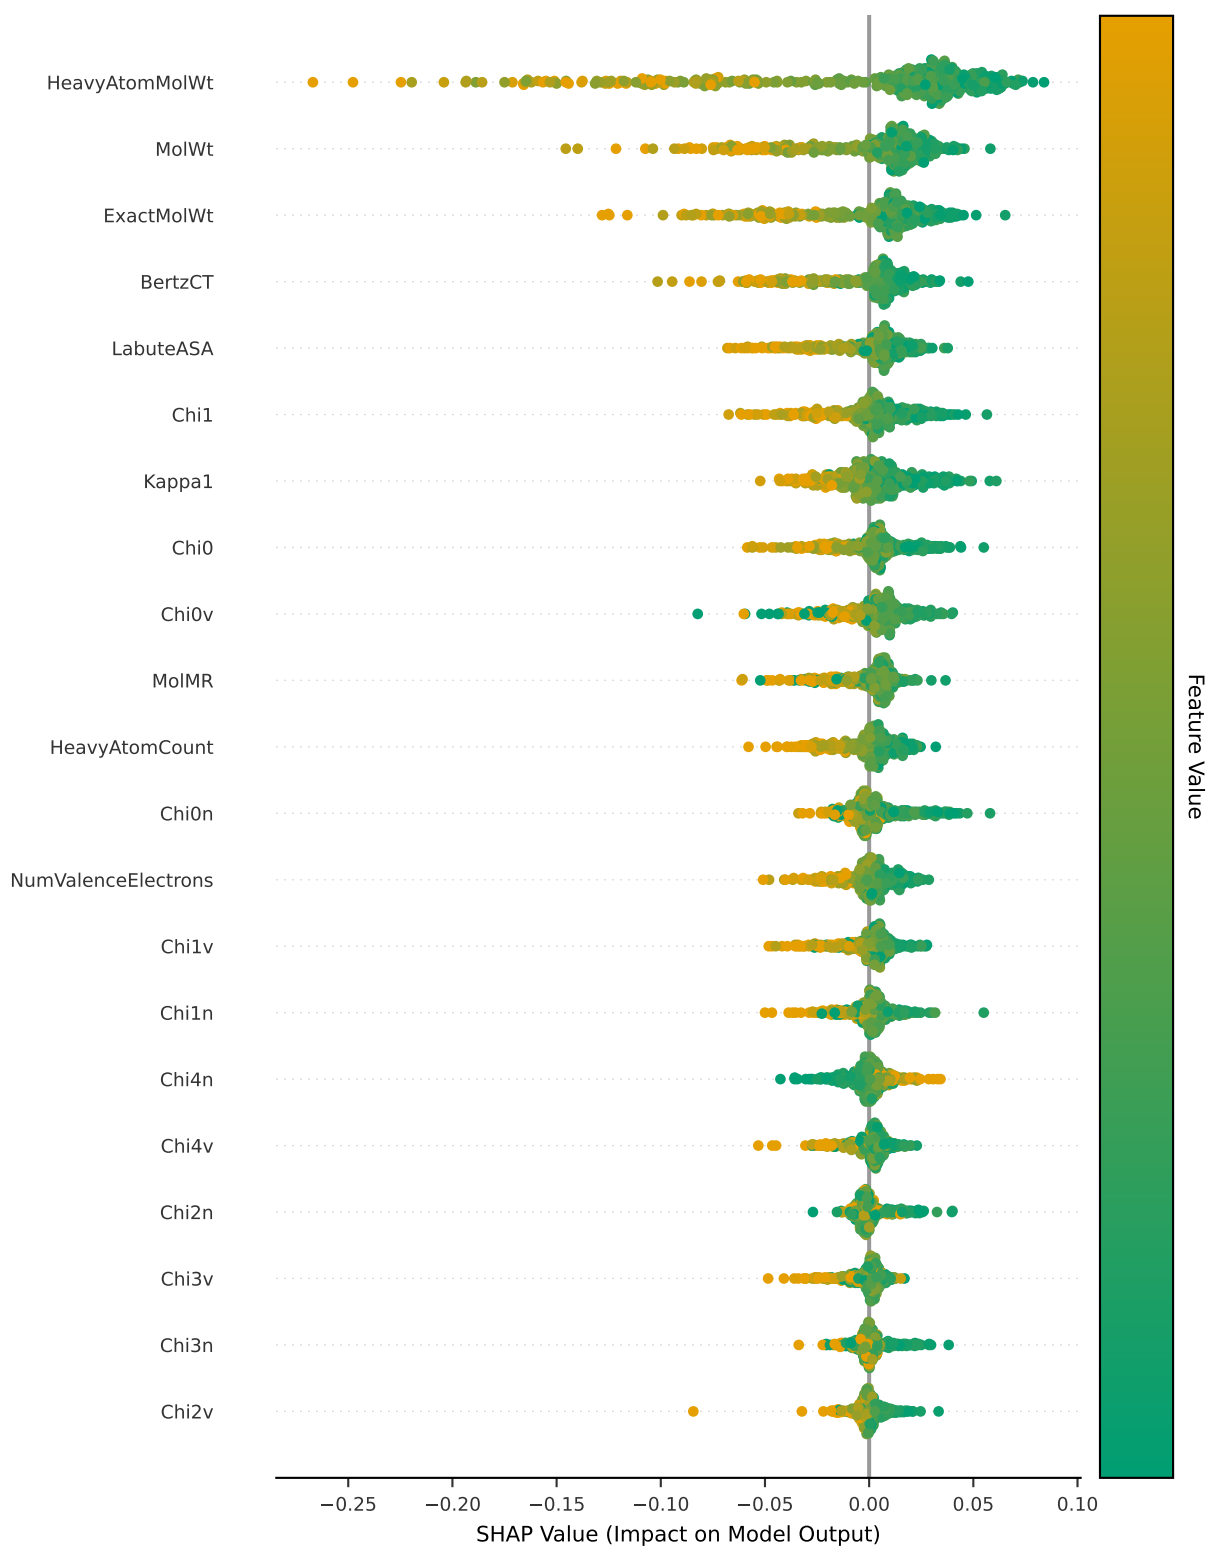

**Figure S15** SHAP feature importance of the features of the 'Weight and Shape' group colored by the relative feature value on the test set using the train set as background. Each dot is an instance of the test set.

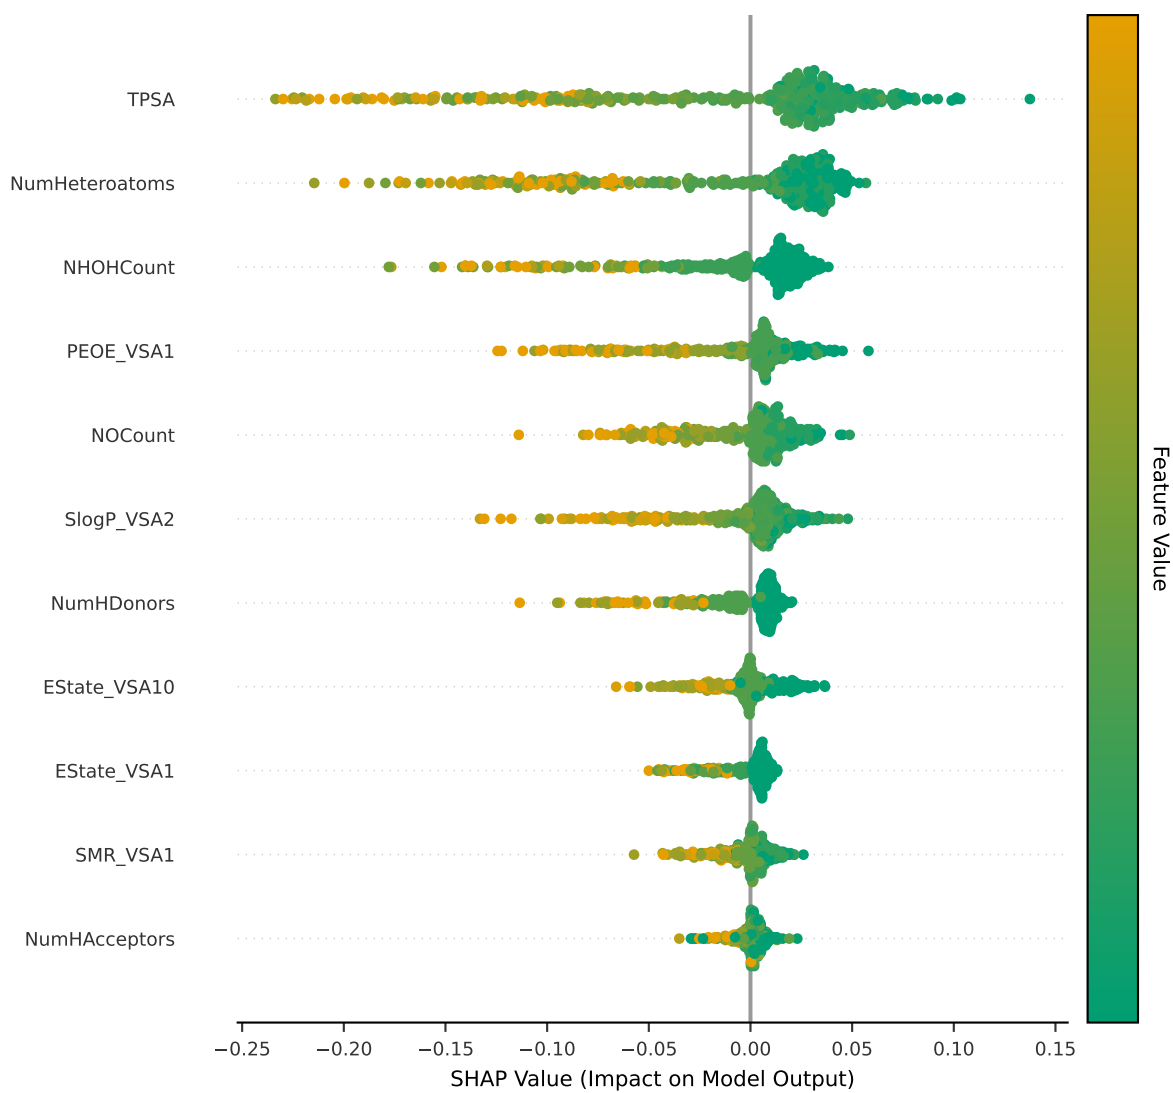

**Figure S16** SHAP feature importance of the features of the 'Polarity' group colored by the relative feature value on the test set using the train set as background. Each dot is an instance of the test set.

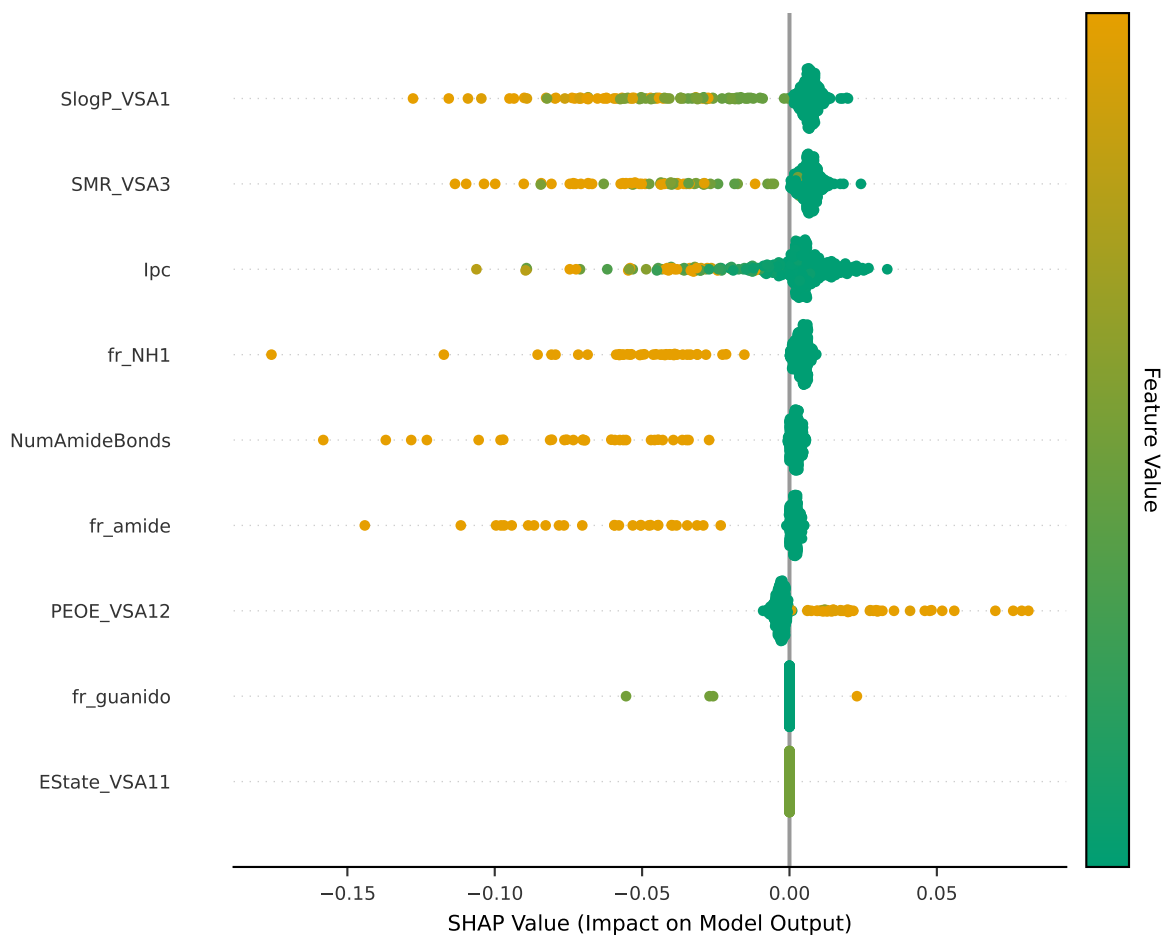

**Figure S17** SHAP feature importance of the features of the 'Nitrogen-Polarity' group colored by the relative feature value on the test set using the train set as background. Each dot is an instance of the test set.

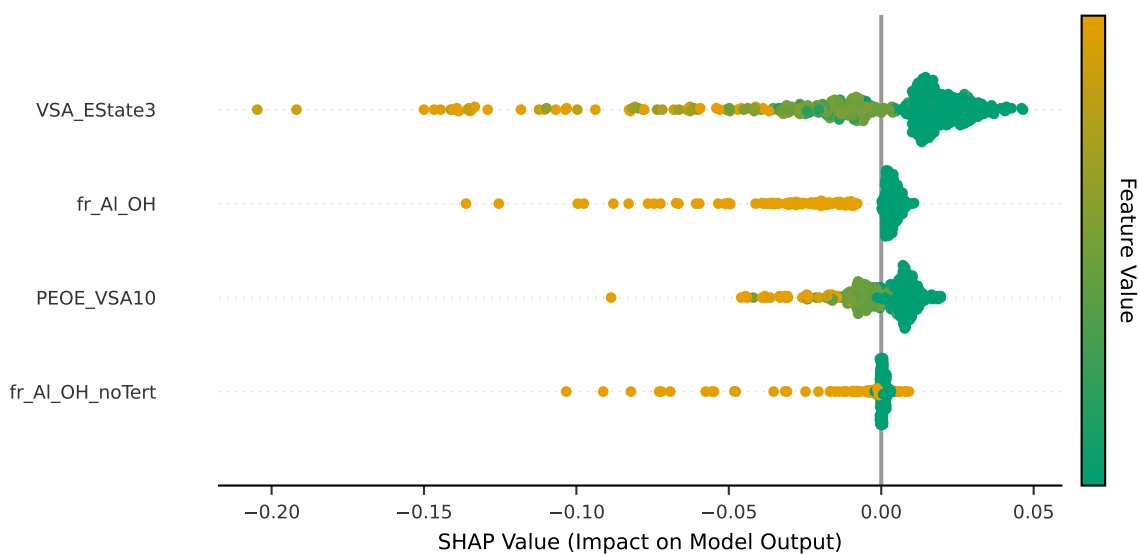

**Figure S18** SHAP feature importance of the features of the 'Alcohol Groups' group colored by the relative feature value on the test set using the train set as background. Each dot is an instance of the test set.

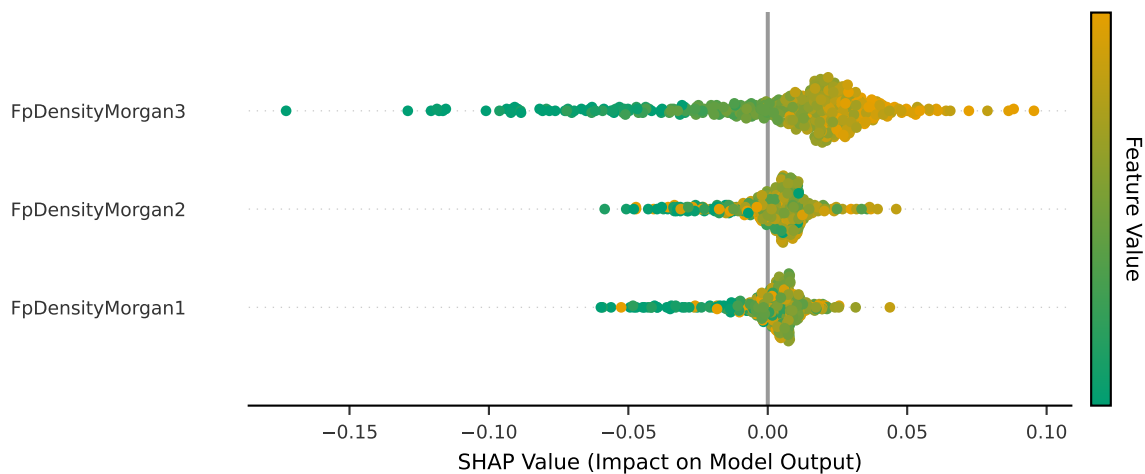

**Figure S19** SHAP feature importance of the features of the 'Morgan Fingerprint Density' group colored by the relative feature value on the test set using the train set as background. Each dot is an instance of the test set.

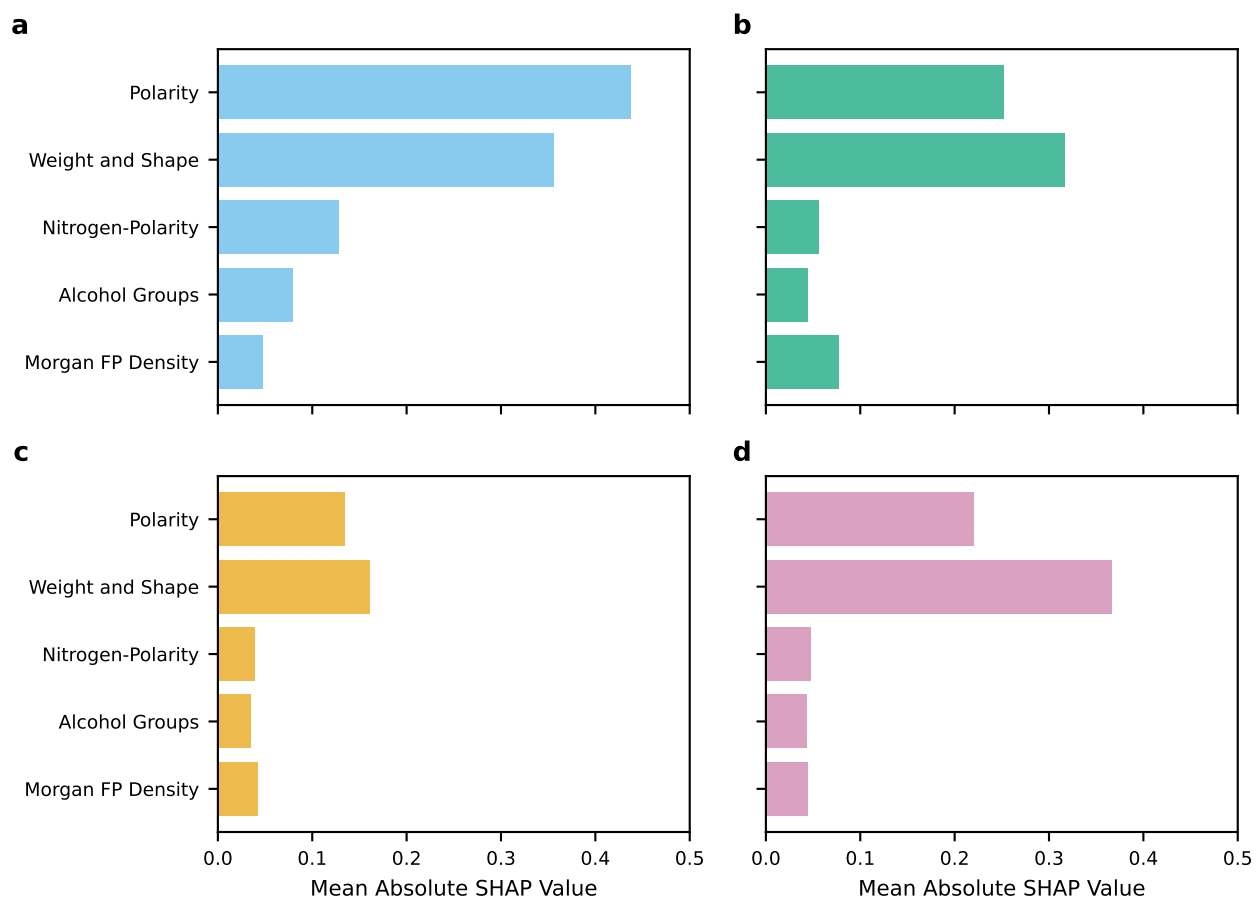

**Figure S20** SHAP feature importance per odor strength prediction category: (a) odorless, (b) low, (c) medium and (d) high odor strength.

Local SHAP feature group contributions for four representative molecules are shown in Figure S21 to illustrate local interpretations. Smaller molecules, such as Ethylene Glycol or Indole, tend to shift the prediction toward higher odor strength, whereas larger molecules, such as Galaxolide, shift it toward lower odor strength. Furthermore, the prediction for the highly polar ethylene glycol is driven by the negative contributions of its alcohol groups and overall polarity, while the lower but sufficient polarity of Galaxolide and Indole contributes positively to their higher odor strengths.

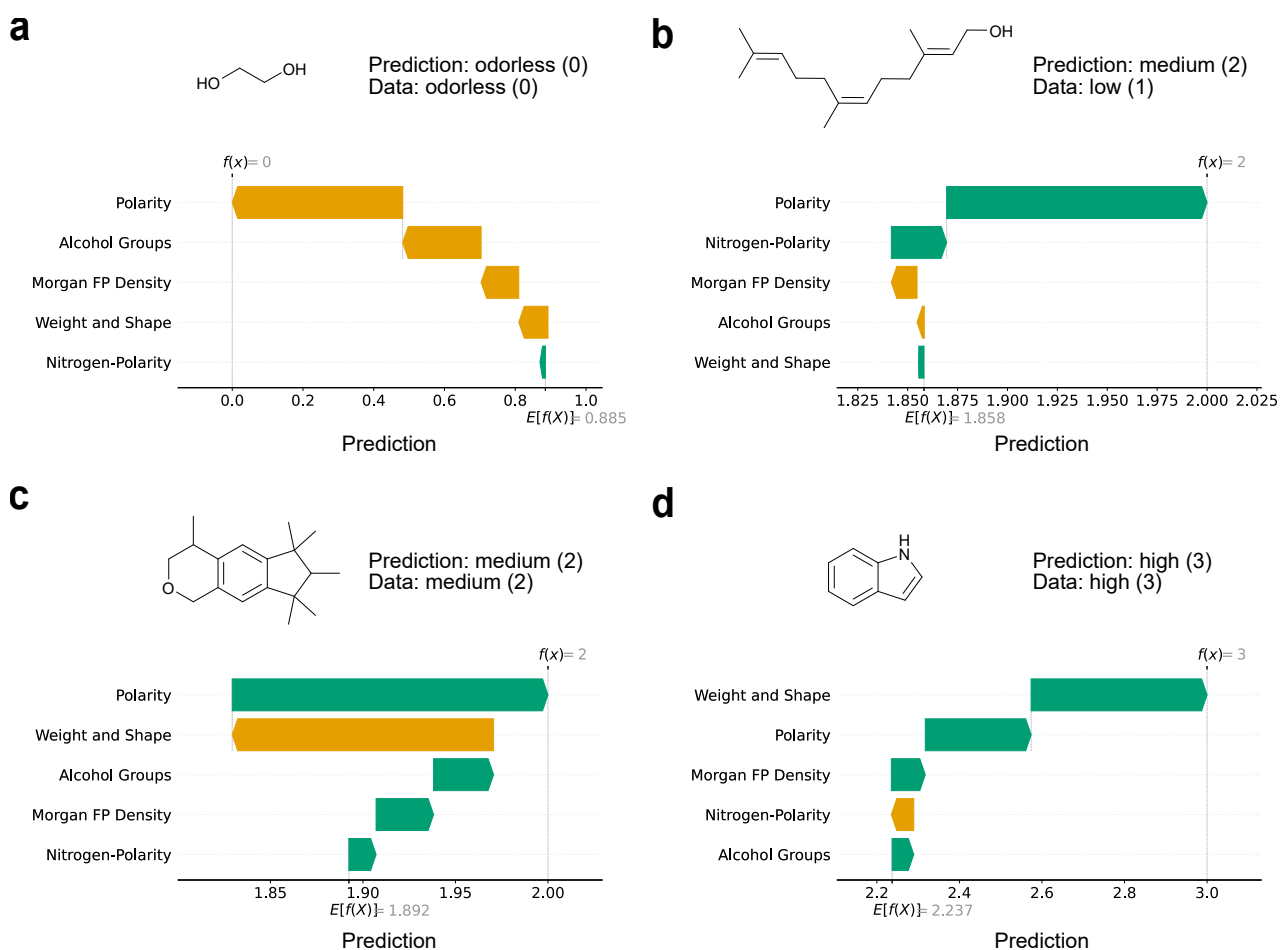

**Figure S21** SHAP waterfall plots of the global most important feature groups for 4 example molecules of the data set using the train set as background. The contribution of each feature (SHAP value) to the prediction to deviate from the average background is shown. The molecules are (a) Ethylene glycol (odorless), (b) *E,Z*-Farnesol (low odor strength), (c) 1,3,4,6,7,8-Hexahydro-4,6,6,7,8,8-hexamethylcyclopenta[*g*]-2-benzopyran, also known as Galaxolide (medium odor strength), (d) Indole (high odor strength).

## S6 Further Method Details

The following keywords were used to map a PubChem description to a corresponding odor strength:

- **Odor strength: description**
- odorless: odourless, odorless, no odour, no odor, very faint, very weak, very mild
- low: faint, weak
- high: very strong, very intense, very powerful, very pungent, very aromatic

The following 13 molecules in Table S20 were originally labeled as 'very high' odor strength and reclassified to 'high' odor strength.

| Name                     | CAS        | Canonical SMILES                   |
|--------------------------|------------|------------------------------------|
| ortho-thioguaiacol       | 7217-59-6  | <chem>COc1ccccc1S</chem>           |
| (Z)-6-nonenal            | 2277-19-2  | <chem>CC/C=C\CCCC=O</chem>         |
| skatole                  | 83-34-1    | <chem>Cc1c[nH]c2ccccc12</chem>     |
| isopropyl mercaptan      | 75-33-2    | <chem>CC(C)S</chem>                |
| caramel furanone         | 28664-35-9 | <chem>CC1=C(O)C(=O)OC1C</chem>     |
| 2-mercaptopropionic acid | 79-42-5    | <chem>CC(S)C(=O)O</chem>           |
| cortex pyridine          | 2110-18-1  | <chem>c1ccc(CCCc2ccccc2)cc1</chem> |
| (Z)-4-heptenal           | 6728-31-0  | <chem>CC/C=C\CCC=O</chem>          |
| 2-acetyl pyrazine        | 22047-25-2 | <chem>CC(=O)c1cnccn1</chem>        |
| 2-acetyl thiazole        | 24295-03-2 | <chem>CC(=O)c1nccs1</chem>         |
| propyl mercaptan         | 107-03-9   | <chem>CCCS</chem>                  |
| maple furanone           | 698-10-2   | <chem>CCC1OC(=O)C(O)=C1C</chem>    |
| Allyl Isothiocyanate     |            | <chem>C=CCN=C=S</chem>             |

**Table S20** Molecules which were originally labeled as 'very high' odor strength and reclassified to 'high' odor strength.

## Notes and references

- 1 E. J. Mayhew, C. J. Arayata, R. C. Gerkin, B. K. Lee, J. M. Magill, L. L. Snyder, K. A. Little, C. W. Yu and J. D. Mainland, *Proc. Natl. Acad. Sci. U.S.A.*, 2022, **119**, e2116576119.
- 2 L. Ruddigkeit, R. van Deursen, L. C. Blum and J.-L. Reymond, *J. Chem. Inf. Model.*, 2012, **52**, 2864–2875.
- 3 L. Hubert and P. Arabie, *J. Classif.*, 1985, **2**, 193–218.
- 4 A. Strehl and J. Ghosh, *J. Mach. Learn. Res.*, 2003, **3**, 583–617.
- 5 X. V. Nguyen, J. Epps and J. Bailey, *J. Mach. Learn. Res.*, 2010, **11**, 2837–2854.
- 6 P. J. Rousseeuw, *J. Comput. Appl. Math.*, 1987, **20**, 53–65.
- 7 S. Lloyd, *IEEE Trans. Inf. Theory*, 1982, **28**, 129–136.
- 8 D. J. Hand, G. J. McLachlan and K. E. Basford, *J. R. Stat. Soc. C: Appl. Stat.*, 1989, **38**, 384.
- 9 M. Ester, H.-P. Kriegel, J. Sander and X. Xu, *Data Min. Knowl. Discov.*, 1996, 226–231.
- 10 Jianbo Shi and J. Malik, *IEEE Trans. Pattern Anal. Mach. Intell.*, 2000, **22**, 888–905.
- 11 A. Ng, M. Jordan and Y. Weiss, *NIPS'01: Proceedings of the 15th International Conference on Neural Information Processing Systems: Natural and Synthetic*, MIT Press, Vancouver, British Columbia, Canada, 2001, vol. 14, pp. 849–856.
- 12 J. H. Ward, *J. Am. Stat. Assoc.*, 1963, **58**, 236–244.
- 13 T. Akiba, S. Sano, T. Yanase, T. Ohta and M. Koyama, *KDD '19: Proceedings of the 25th ACM SIGKDD International Conference on Knowledge Discovery & Data Mining*, Association for Computing Machinery, Anchorage, AK, USA, 2019, pp. 2623–2631.
- 14 H. L. Morgan, *J. Chem. Doc.*, 1965, **5**, 107–113.
- 15 D. Rogers and M. Hahn, *J. Chem. Inf. Model.*, 2010, **50**, 742–754.
- 16 *RDKit: Open-source Cheminformatics (Release\_2025.03.5)*, <https://zenodo.org/doi/10.5281/zenodo.591637>, (accessed October 2025).
- 17 R. Nilakantan, N. Bauman, J. S. Dixon and R. Venkataraghavan, *J. Chem. Inf. Comput. Sci.*, 1987, **27**, 82–85.
- 18 R. E. Carhart, D. H. Smith and R. Venkataraghavan, *J. Chem. Inf. Comput. Sci.*, 1985, **25**, 64–73.
- 19 W. Ahmad, E. Simon, S. Chithrananda, G. Grand and B. Ramsundar, *arXiv*, 2022, preprint, arXiv:2209.01712, <https://arxiv.org/abs/2209.01712>.
- 20 J. L. Durant, B. A. Leland, D. R. Henry and J. G. Nourse, *J. Chem. Inf. Comput. Sci.*, 2002, **42**, 1273–1280.
- 21 P.-F. Verhulst, *Nouv. Mem. Acad. R. Sci. Bruxelles*, 1845, **18**, 1–38.

- 22 L. Breiman, *Mach. Learn.*, 2001, **45**, 5–32.
- 23 T. Chen and C. Guestrin, *KDD '16: Proceedings of the 22nd ACM SIGKDD International Conference on Knowledge Discovery and Data Mining*, Association for Computing Machinery, San Francisco, California, USA, 2016, pp. 785–794.
- 24 D. E. Rumelhart, G. E. Hinton and R. J. Williams, *Nature*, 1986, **323**, 533–536.
- 25 P. Adam, A. Paszke, G. Sam, S. Gross, M. Francisco, F. Massa, A. Lerer, B. James, J. T. Bradbury, C. Gregory, G. Chanan, K. Trevor, T. Killeen, L. Zeming, Z. Lin, G. Natalia, N. Gimelshein, A. Luca, L. Antiga, D. Alban, A. Desmaison, K. Andreas, A. Köpf, Y. Edward, E. Yang, D. Zach, Z. DeVito, R. Martin, M. Raison, T. Alykhan, A. Tejani, C. Sasank, S. Chilamkurthy, S. Benoit, B. Steiner, F. Lu, F. Liu, B. Junjie, J. Bai, C. Soumith and S. Chintala, *arXiv*, 2019, preprint, arXiv:1912.01703, <https://arxiv.org/abs/1912.01703>.
- 26 W. Cao, V. Mirjalili and S. Raschka, *Pattern Recognit. Lett.*, 2020, **140**, 325–331.
- 27 K. Yang, K. Swanson, W. Jin, C. W. Coley, P. Eiden, H. Gao, A. Guzmán-Pérez, A. Guzman-Perez, T. Hopper, B. Kelley, M. Mathea, A. Palmer, V. Settels, T. S. Jaakkola, K. F. Jensen and R. Barzilay, *J. Chem. Inf. Model.*, 2019, **59**, 3370–3388.
- 28 E. Heid, K. P. Greenman, Y. Chung, S.-C. Li, D. E. Graff, F. H. Vermeire, H. Wu, W. H. Green and C. J. McGill, *J. Chem. Inf. Model.*, 2024, **64**, 9–17.
- 29 J. Burns, A. S. Zalte and W. Green, *arXiv*, 2025, preprint, arXiv: 2506.15792, <https://arxiv.org/abs/2506.15792>.
- 30 A. Keller, R. C. Gerkin, Y. Guan, A. Dhurandhar, G. Turu, B. Szalai, J. D. Mainland, Y. Ihara, C. W. Yu, R. Wolfinger, C. Vens, L. Schietgat, K. De Grave, R. Norel, D. O. P. Consortium, G. Stolovitzky, G. A. Cecchi, L. B. Vosshall and P. Meyer, *Science*, 2017, **355**, 820–826.
